# Supplementary material for: Glycosylated coumarins, flavonoids, lignans and phenylpropanoids from Wikstroemia nutans and their biological activities
Source: publisher site journal article supplement (doi:10.3762/bjoc.18.23), 2022-02-16
Supplement: Additional file 1 [file 1860-5397-18-23-S1.pdf]

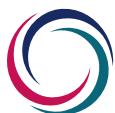

## Supporting Information

for

### **Glycosylated coumarins, flavonoids, lignans and phenylpropanoids from *Wikstroemia nutans* and their biological activities**

Meifang Wu, Xiangdong Su, Yichuang Wu, Yuanjing Luo, Ying Guo and Yongbo Xue

*Beilstein J. Org. Chem.* **2022**, *18*, 200–207. [doi:10.3762/bjoc.18.23](https://doi.org/10.3762/bjoc.18.23)

### **NMR, MS, UV, IR spectra and HPLC chromatogram of derivative 1**

| Table of Contents                                                                                                      | Page |
|------------------------------------------------------------------------------------------------------------------------|------|
| <b>Figure S1:</b> HR-ESIMS spectrum of compound <b>1</b> .                                                             | S3   |
| <b>Figure S2:</b> IR spectrum of compound <b>1</b> .                                                                   | S3   |
| <b>Figure S3:</b> UV spectrum of compound <b>1</b> .                                                                   | S4   |
| <b>Figure S4:</b> HPLC chromatogram of acid-hydrolyzed compound <b>1</b> and standard sugar.                           | S4   |
| <b>Figure S5:</b> $^1\text{H}$ NMR spectrum of compound <b>1</b> (600 MHz, pyridine- $d_5$ ).                          | S5   |
| <b>Figure S6:</b> $^1\text{H}$ NMR spectrum of compound <b>1</b> (600 MHz, pyridine- $d_5$ ) (expanded).               | S5   |
| <b>Figure S7:</b> $^{13}\text{C}$ NMR spectrum of compound <b>1</b> (600 MHz, pyridine- $d_5$ ).                       | S6   |
| <b>Figure S8:</b> $^{13}\text{C}$ NMR spectrum of compound <b>1</b> (600 MHz, pyridine- $d_5$ ) (expanded).            | S6   |
| <b>Figure S9:</b> DEPT 135 spectrum of compound <b>1</b> (600 MHz, pyridine- $d_5$ ).                                  | S7   |
| <b>Figure S10:</b> $^1\text{H}, ^1\text{H}$ COSY spectrum of compound <b>1</b> (600 MHz, pyridine- $d_5$ ).            | S7   |
| <b>Figure S11:</b> $^1\text{H}, ^1\text{H}$ COSY spectrum of compound <b>1</b> (600 MHz, pyridine- $d_5$ ) (expanded). | S8   |
| <b>Figure S12:</b> $^1\text{H}, ^1\text{H}$ COSY spectrum of compound <b>1</b> (600 MHz, pyridine- $d_5$ ) (expanded). | S8   |
| <b>Figure S13:</b> HSQC spectrum of compound <b>1</b> (600 MHz, pyridine- $d_5$ ).                                     | S9   |
| <b>Figure S14:</b> HSQC spectrum of compound <b>1</b> (600 MHz, pyridine- $d_5$ ) (expanded).                          | S9   |
| <b>Figure S15:</b> HSQC spectrum of compound <b>1</b> (600 MHz, pyridine- $d_5$ ) (expanded).                          | S10  |
| <b>Figure S16:</b> HMBC spectrum of compound <b>1</b> (600 MHz, pyridine- $d_5$ ).                                     | S10  |
| <b>Figure S17:</b> HMBC spectrum of compound <b>1</b> (600 MHz, pyridine- $d_5$ ) (expanded).                          | S11  |
| <b>Figure S18:</b> HMBC spectrum of compound <b>1</b> (600 MHz, pyridine- $d_5$ ) (expanded).                          | S11  |
| <b>Figure S19:</b> $^1\text{H}$ NMR spectrum of compound <b>1</b> (800 MHz, DMSO- $d_6$ ).                             | S12  |
| <b>Figure S20:</b> $^1\text{H}$ NMR spectrum of compound <b>1</b> (800 MHz, DMSO- $d_6$ ) (expanded).                  | S12  |
| <b>Figure S21:</b> $^1\text{H}$ NMR spectrum of compound <b>1</b> (800 MHz, DMSO- $d_6$ ) (expanded).                  | S13  |
| <b>Figure S22:</b> $^{13}\text{C}$ NMR spectrum of compound <b>1</b> (200 MHz, DMSO- $d_6$ ).                          | S13  |
| <b>Figure S23:</b> $^{13}\text{C}$ NMR spectrum of compound <b>1</b> (200 MHz, DMSO- $d_6$ ) (expanded).               | S14  |
| <b>Figure S24:</b> $^1\text{H}, ^1\text{H}$ COSY spectrum of compound <b>1</b> (DMSO- $d_6$ ).                         | S14  |
| <b>Figure S25:</b> $^1\text{H}, ^1\text{H}$ COSY spectrum of compound <b>1</b> (DMSO- $d_6$ ) (expanded).              | S15  |
| <b>Figure S26:</b> $^1\text{H}, ^1\text{H}$ COSY spectrum of compound <b>1</b> (DMSO- $d_6$ ) (expanded).              | S15  |
| <b>Figure S27:</b> HSQC spectrum of compound <b>1</b> (DMSO- $d_6$ ).                                                  | S16  |
| <b>Figure S28:</b> HSQC spectrum of compound <b>1</b> (DMSO- $d_6$ ) (expanded).                                       | S16  |
| <b>Figure S29:</b> HSQC spectrum of compound <b>1</b> (DMSO- $d_6$ ) (expanded).                                       | S17  |
| <b>Figure S30:</b> HMBC spectrum of compound <b>1</b> (DMSO- $d_6$ ).                                                  | S17  |
| <b>Figure S31:</b> HMBC spectrum of compound <b>1</b> (DMSO- $d_6$ ) (expanded).                                       | S18  |
| <b>Figure S32:</b> HMBC spectrum of compound <b>1</b> (DMSO- $d_6$ ) (expanded).                                       | S18  |
| <b>Figure S33:</b> ROESY spectrum of compound <b>1</b> (DMSO- $d_6$ ).                                                 | S19  |
| <b>Figure S34:</b> ROESY spectrum of compound <b>1</b> (DMSO- $d_6$ ) (expanded).                                      | S19  |

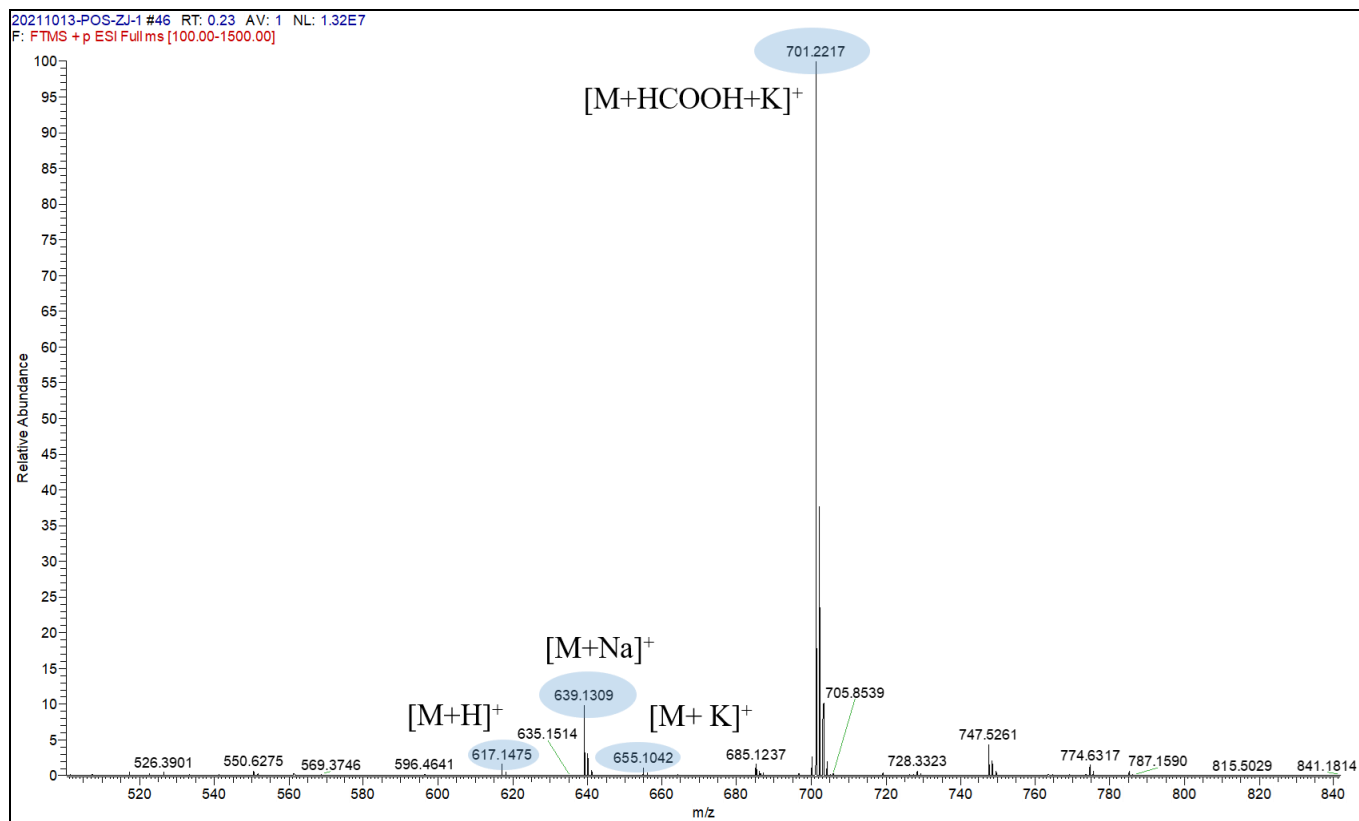

**Figure S1.** HR-ESIMS spectrum of compound **1**

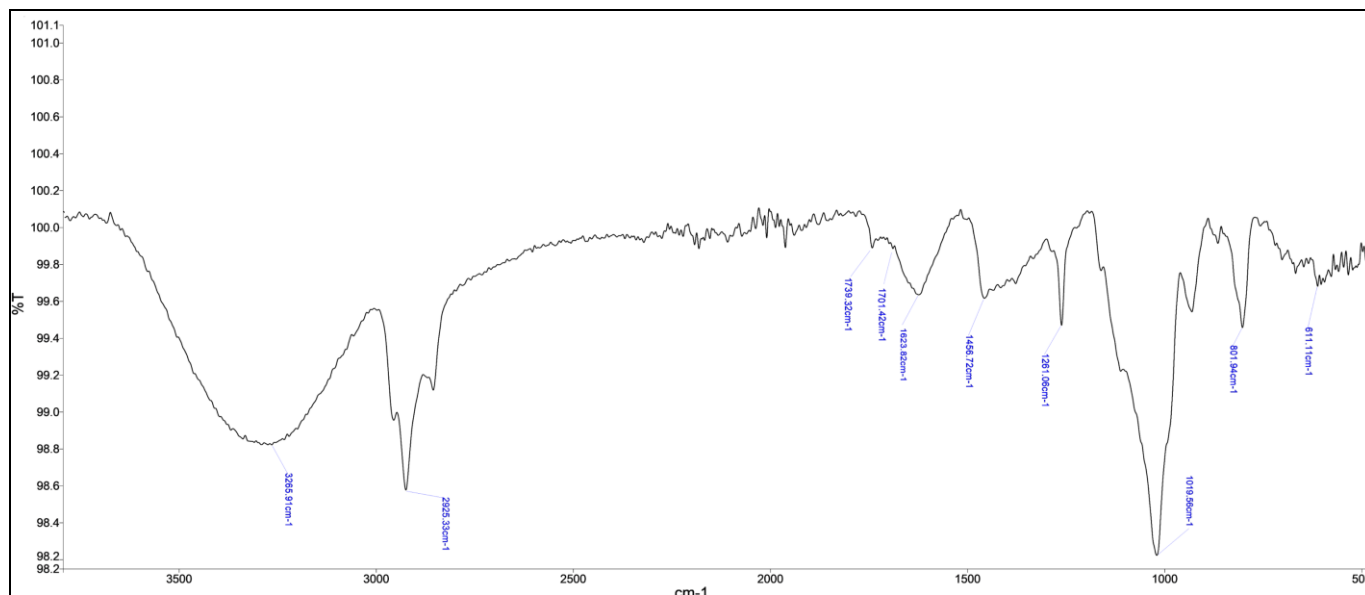

IR spectra were obtained on PerkinElmer FT-IR C106150 and Bruker Tensor 37 infrared spectrophotometers.

**Figure S2.** IR spectrum of compound **1** in MeOH.

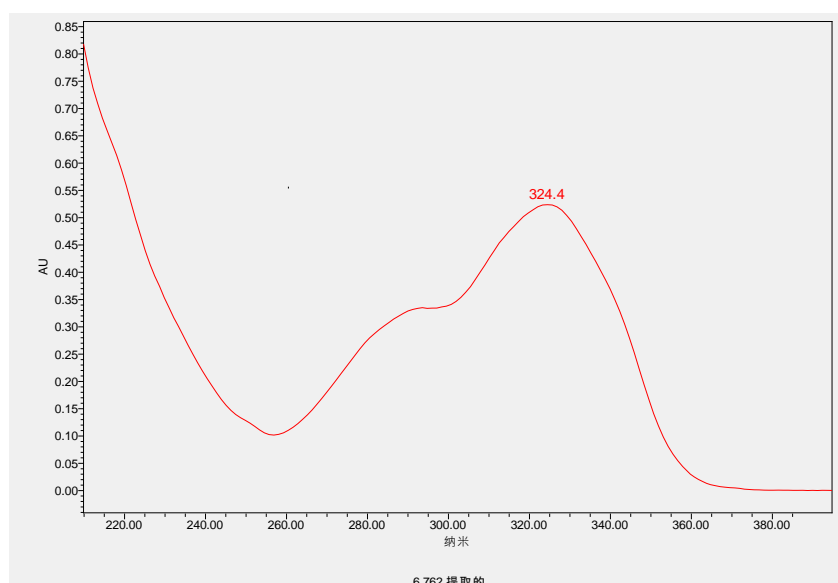

**Figure S3.** UV spectrum of compound **1** in MeOH.

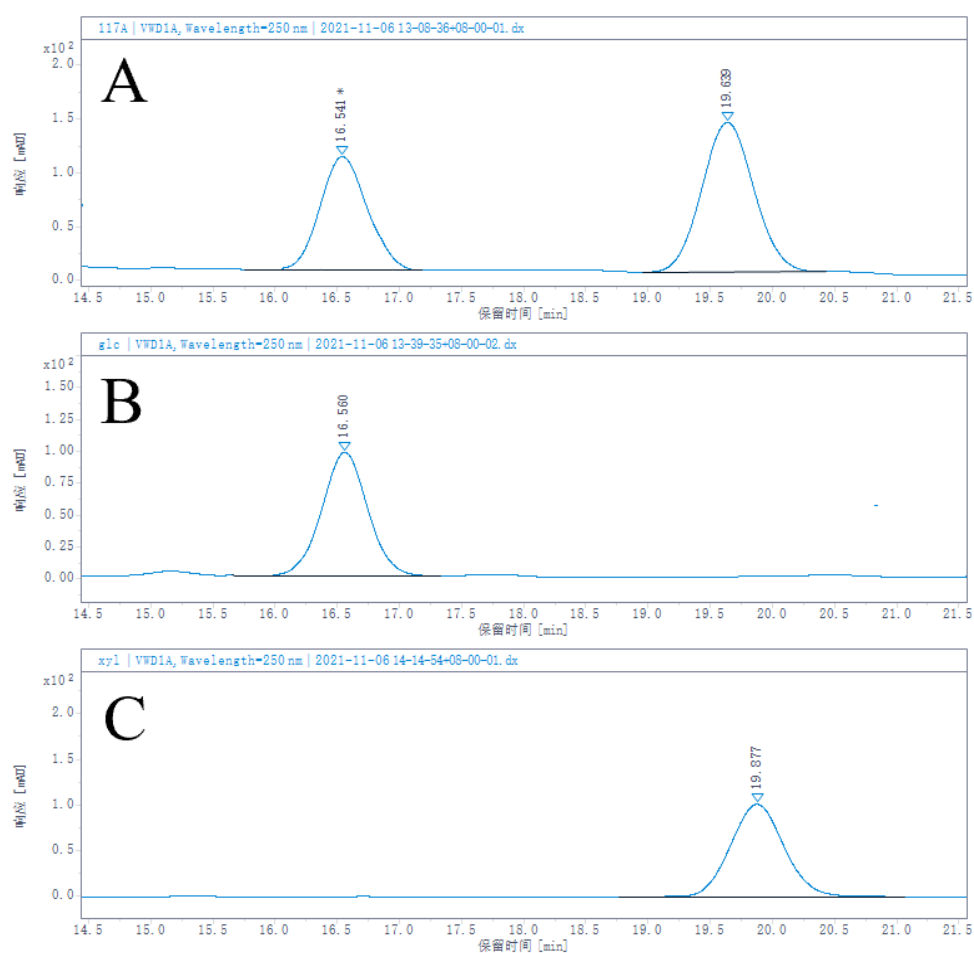

**Figure S4.** HPLC chromatogram of the wikstronutin (**1**) derivatives.  
Retention Times: (A) wikstronutin (**1**) (B) D-glucose (C) D-xylose.

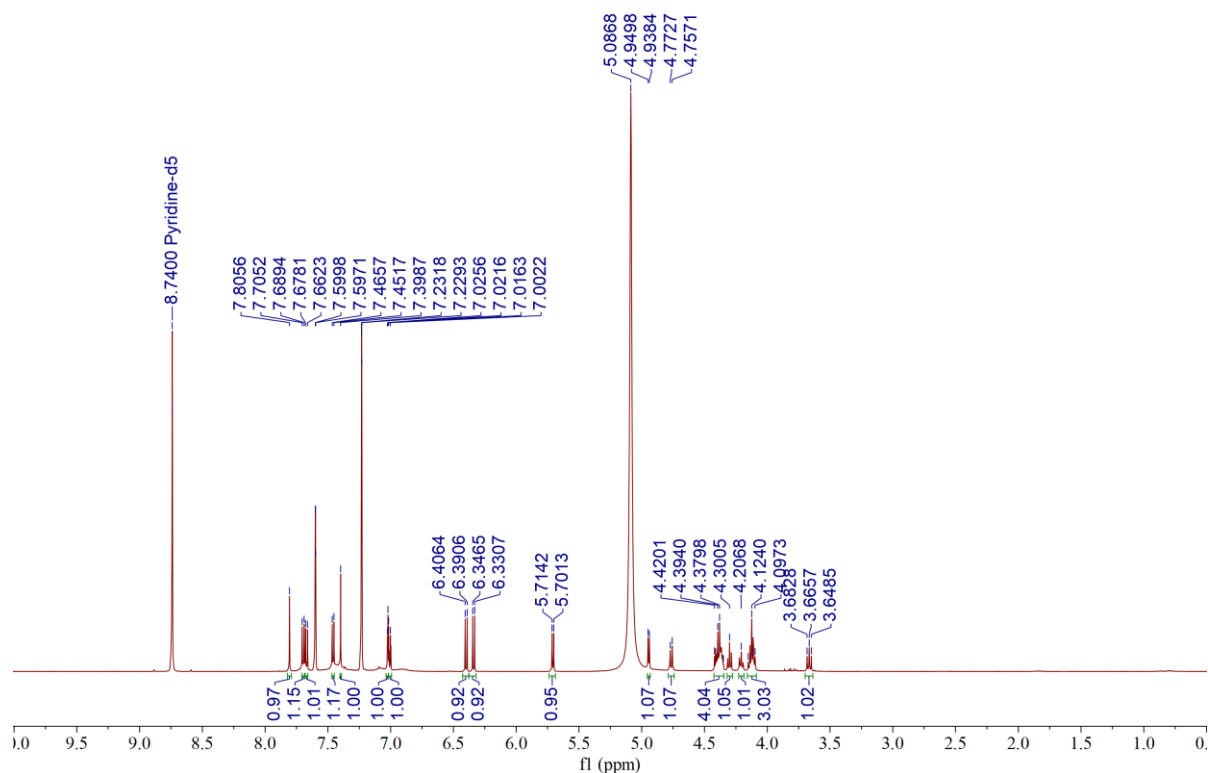

**Figure S5.** <sup>1</sup>H NMR spectrum of compound **1** (600 MHz, pyridine-*d*<sub>5</sub>).

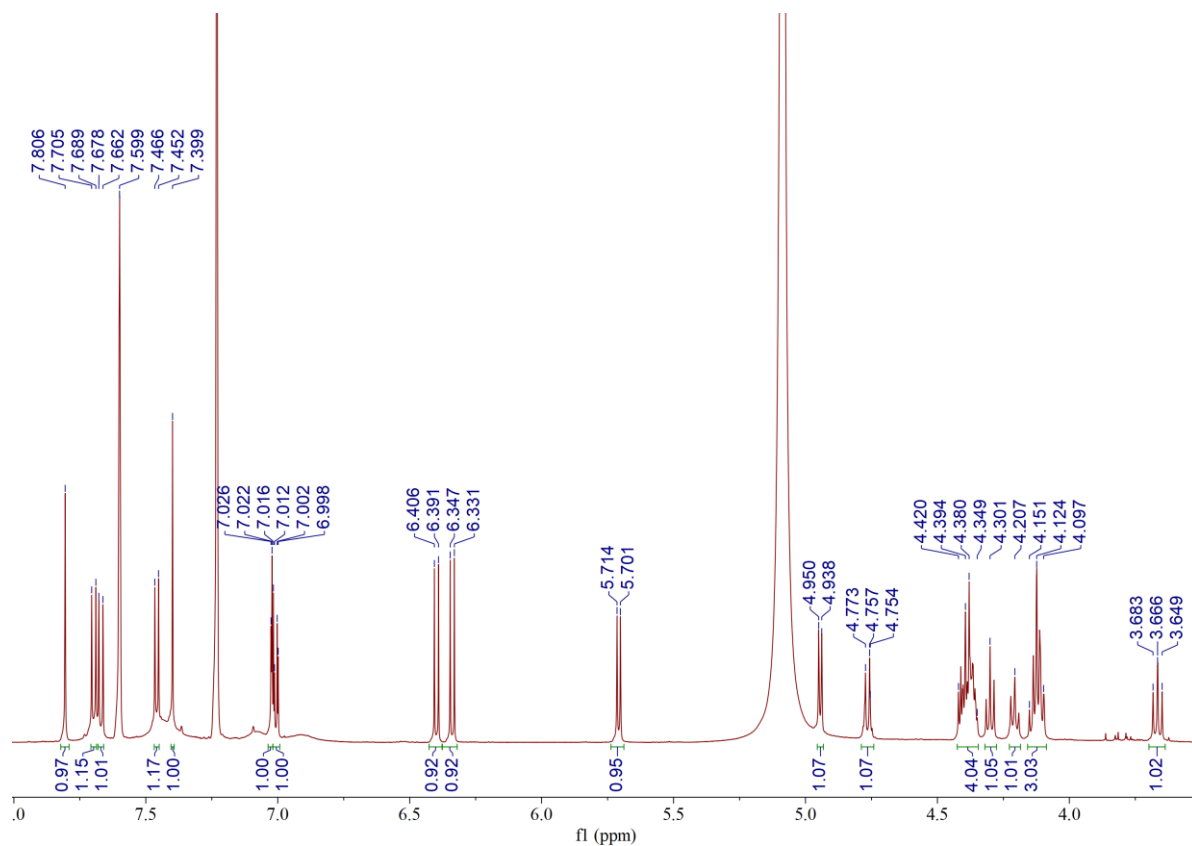

**Figure S6.** <sup>1</sup>H NMR spectrum of compound **1** (600 MHz, pyridine-*d*<sub>5</sub>) (expanded).

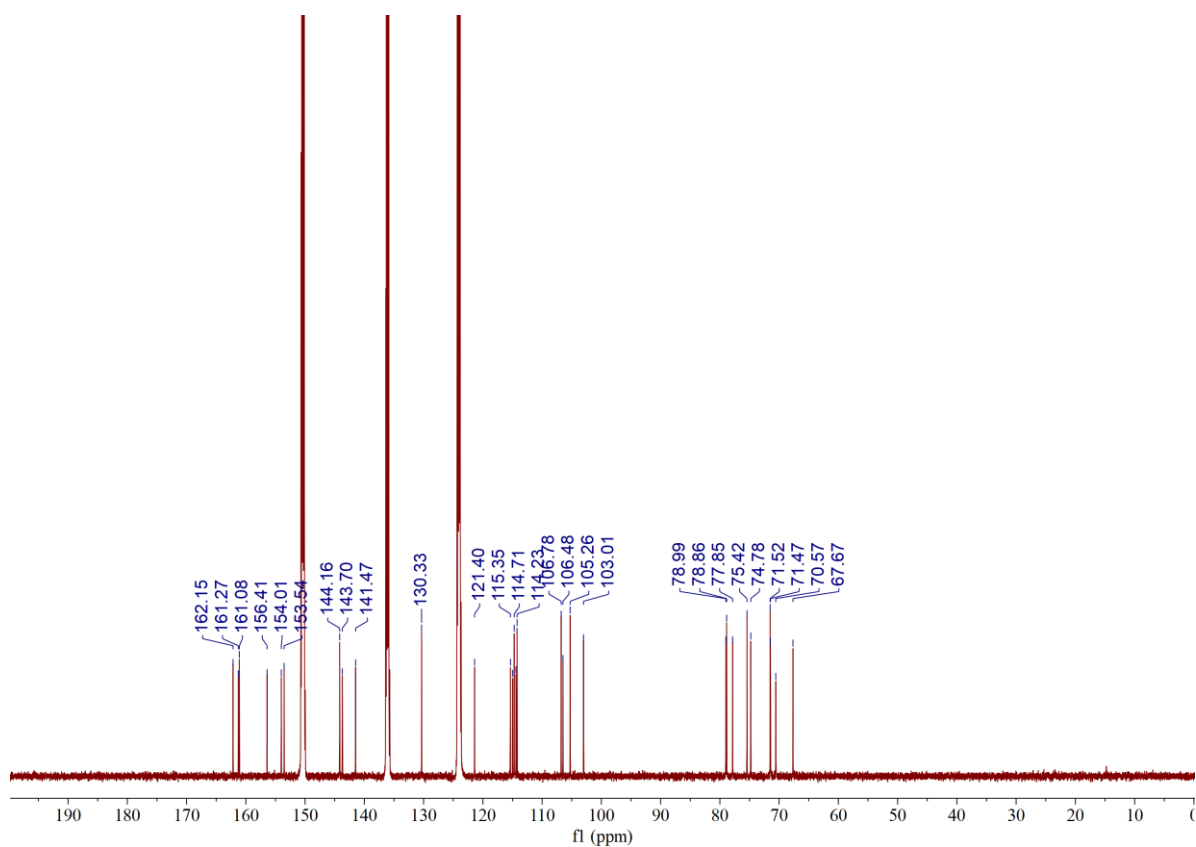

**Figure S7.** <sup>13</sup>C NMR spectrum of compound **1** (600 MHz, pyridine-*d*<sub>5</sub>).

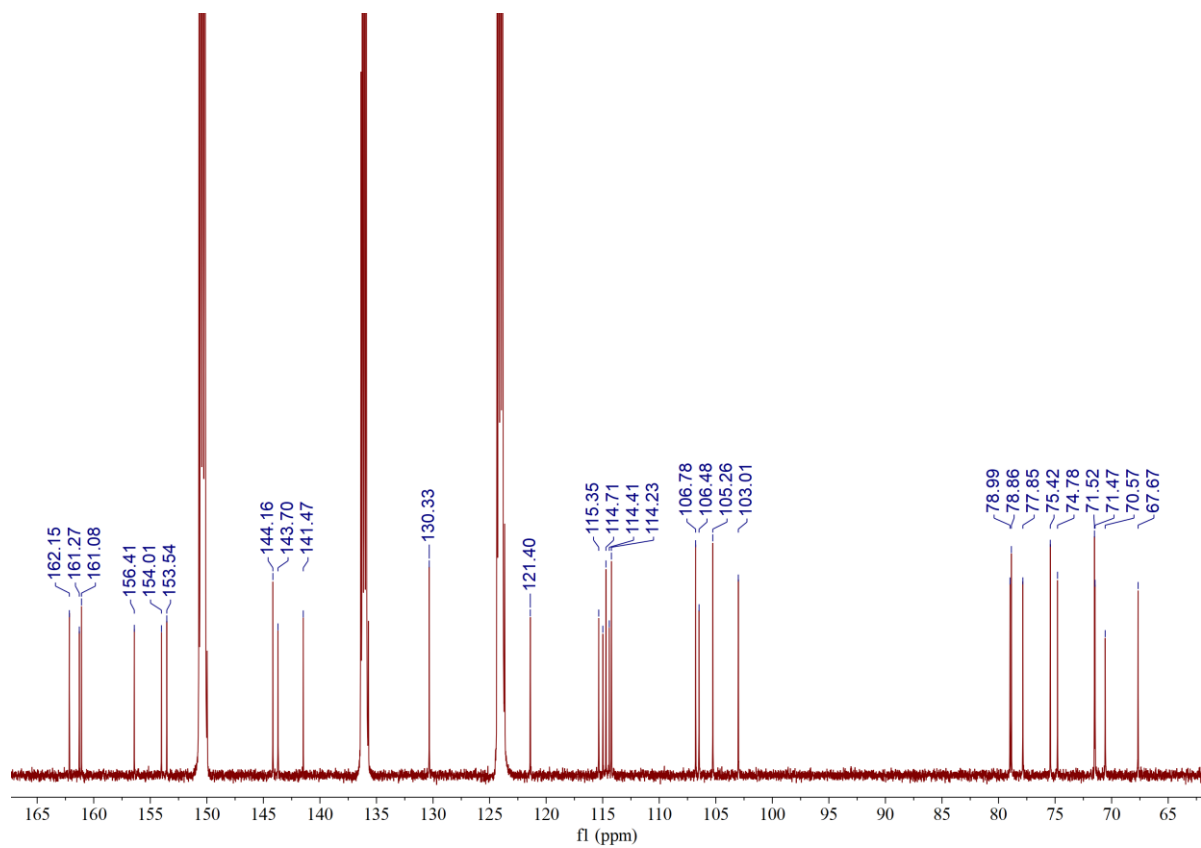

**Figure S8.** <sup>13</sup>C NMR spectrum of compound **1** (600 MHz, pyridine-*d*<sub>5</sub>) (expanded).

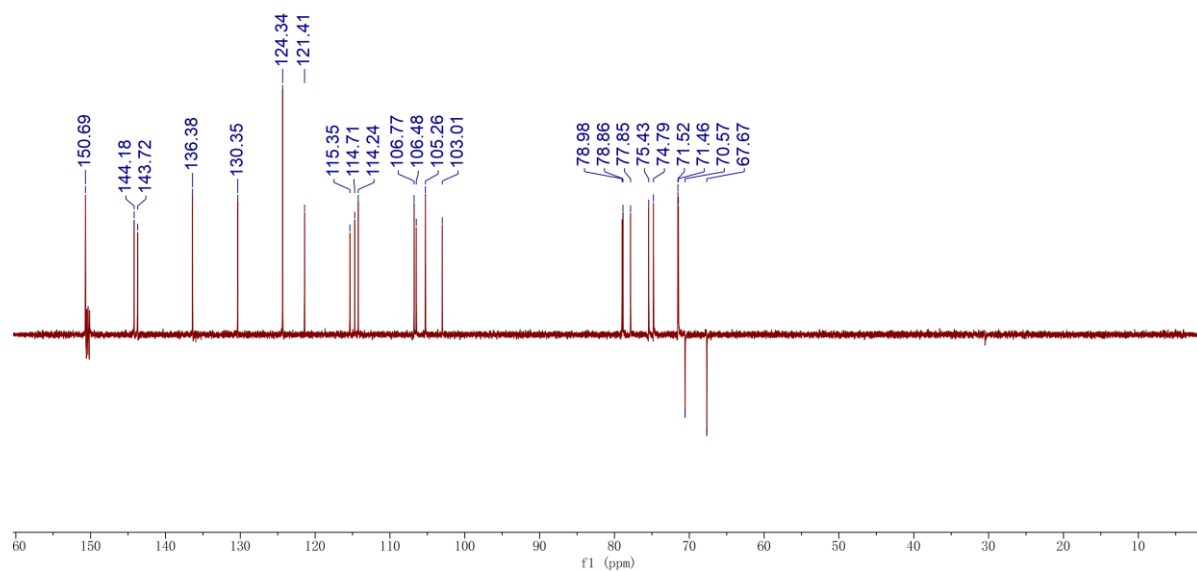

**Figure S9.** DEPT 135 spectrum of compound **1** (600 MHz, pyridine- $d_5$ ).

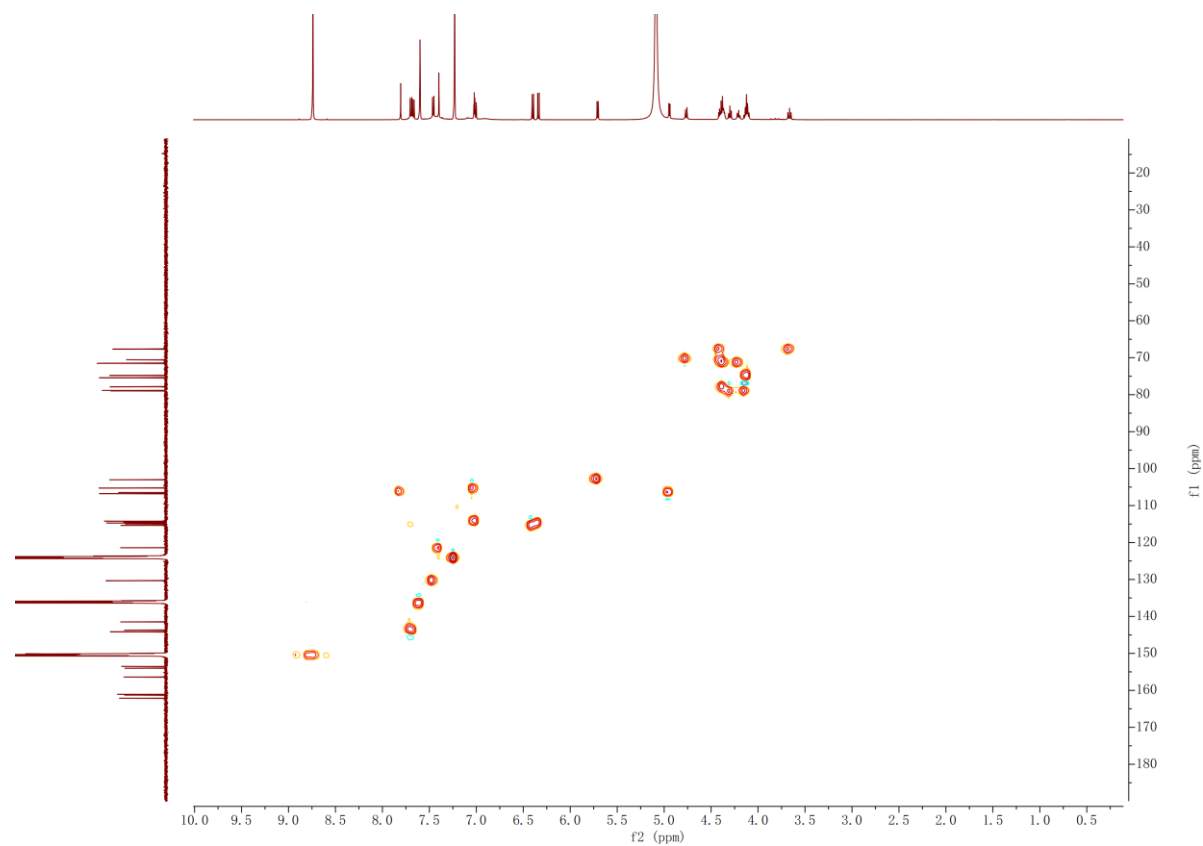

**Figure S10.**  $^1\text{H}, ^1\text{H}$  COSY spectrum of compound **1** (600 MHz, pyridine- $d_5$ ).

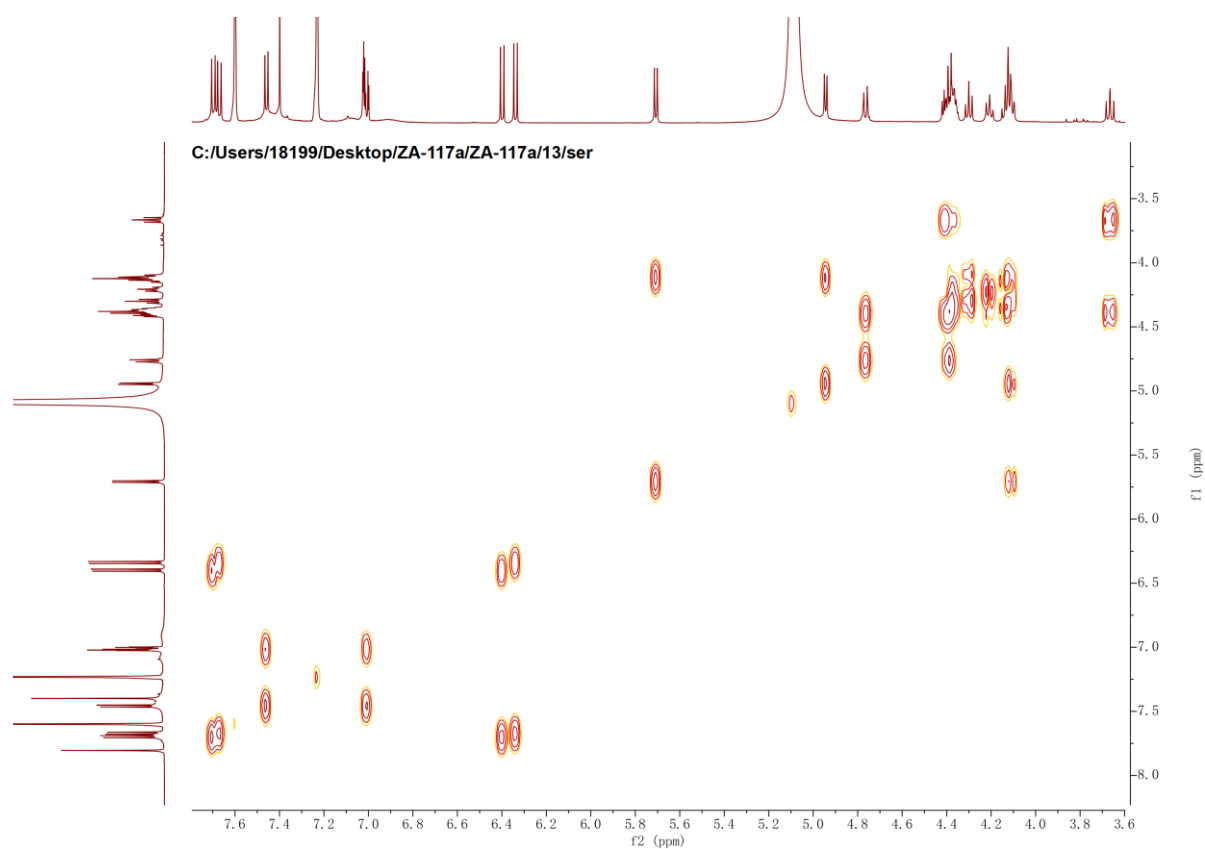

**Figure S11.**  $^1\text{H}$ ,  $^1\text{H}$  COSY spectrum of compound **1** (600 MHz, pyridine- $d_5$ ) (expanded).

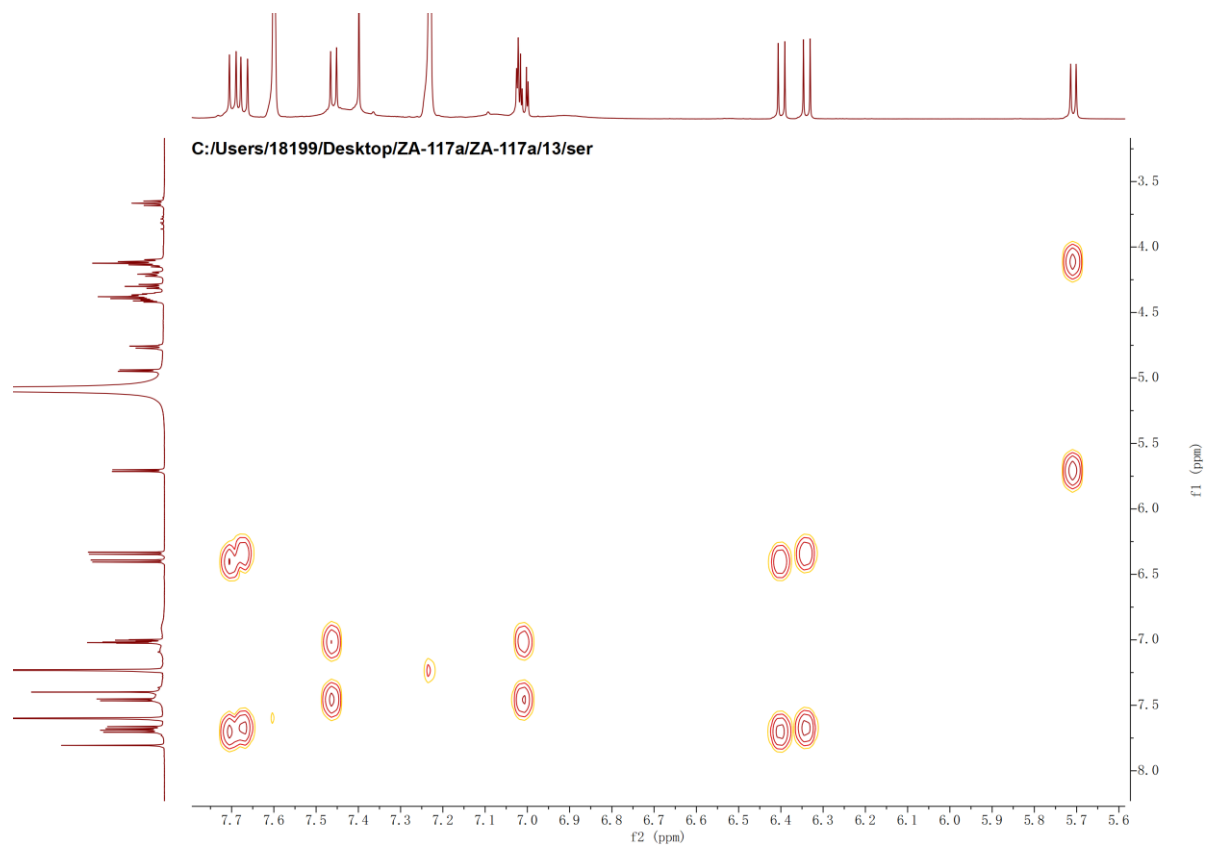

**Figure S12.**  $^1\text{H}$ ,  $^1\text{H}$  COSY spectrum of compound **1** (600 MHz, pyridine- $d_5$ ) (expanded).



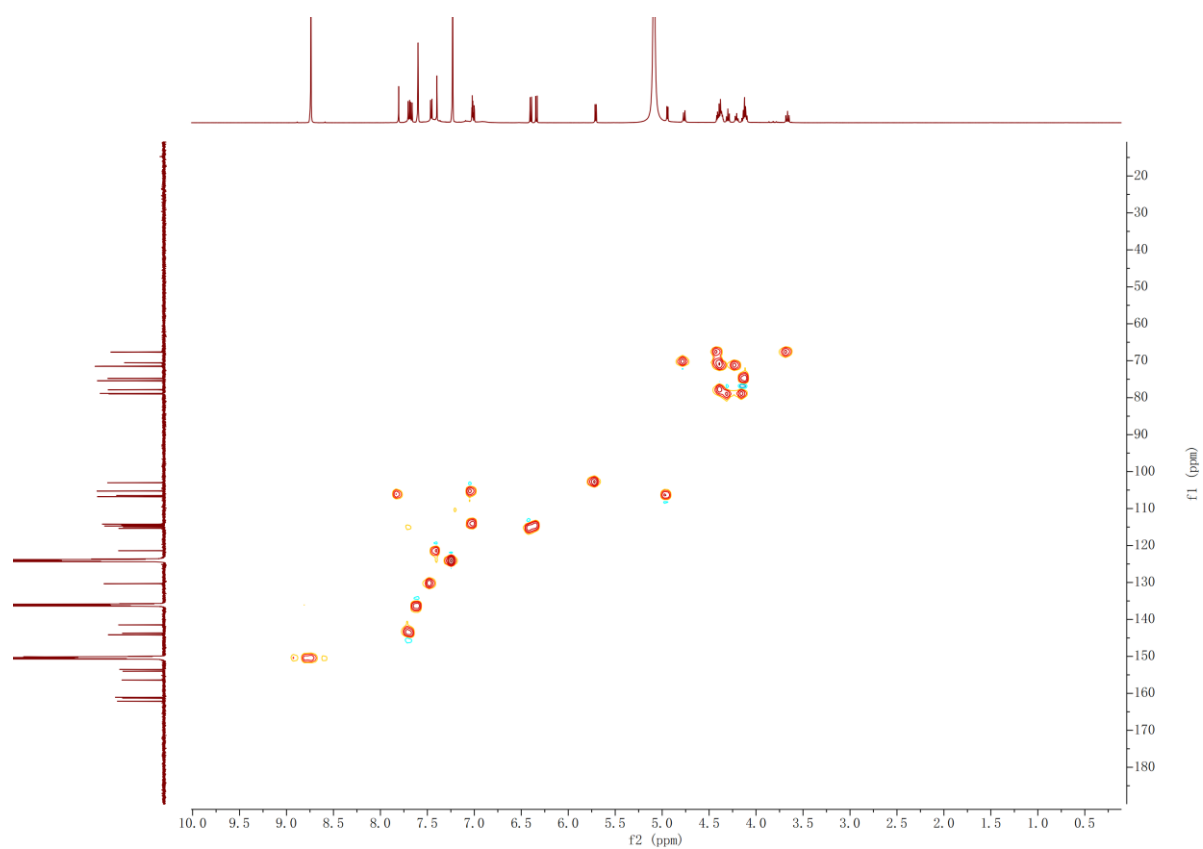

**Figure S13.** HSQC spectrum of compound **1** (600 MHz, pyridine- $d_5$ ).

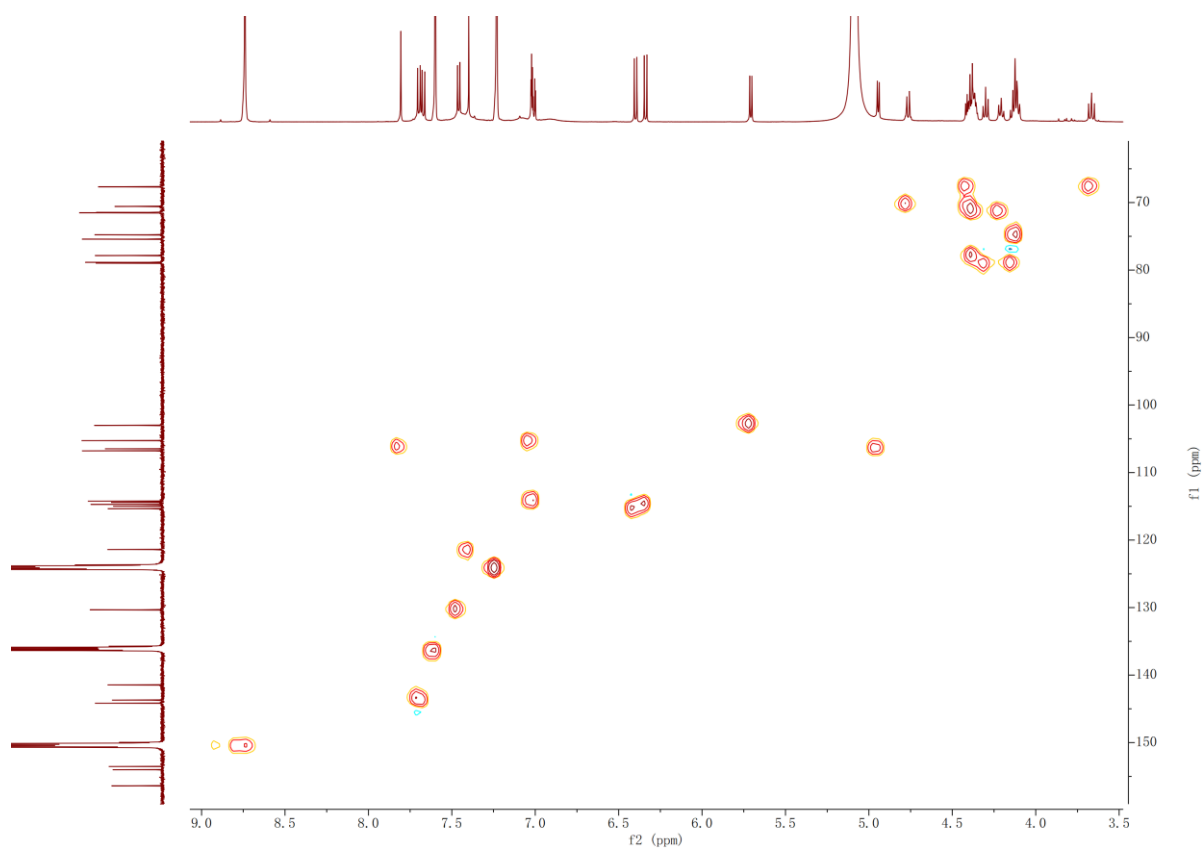

**Figure S14.** HSQC spectrum of compound **1** (600 MHz, pyridine- $d_5$ ) (expanded).

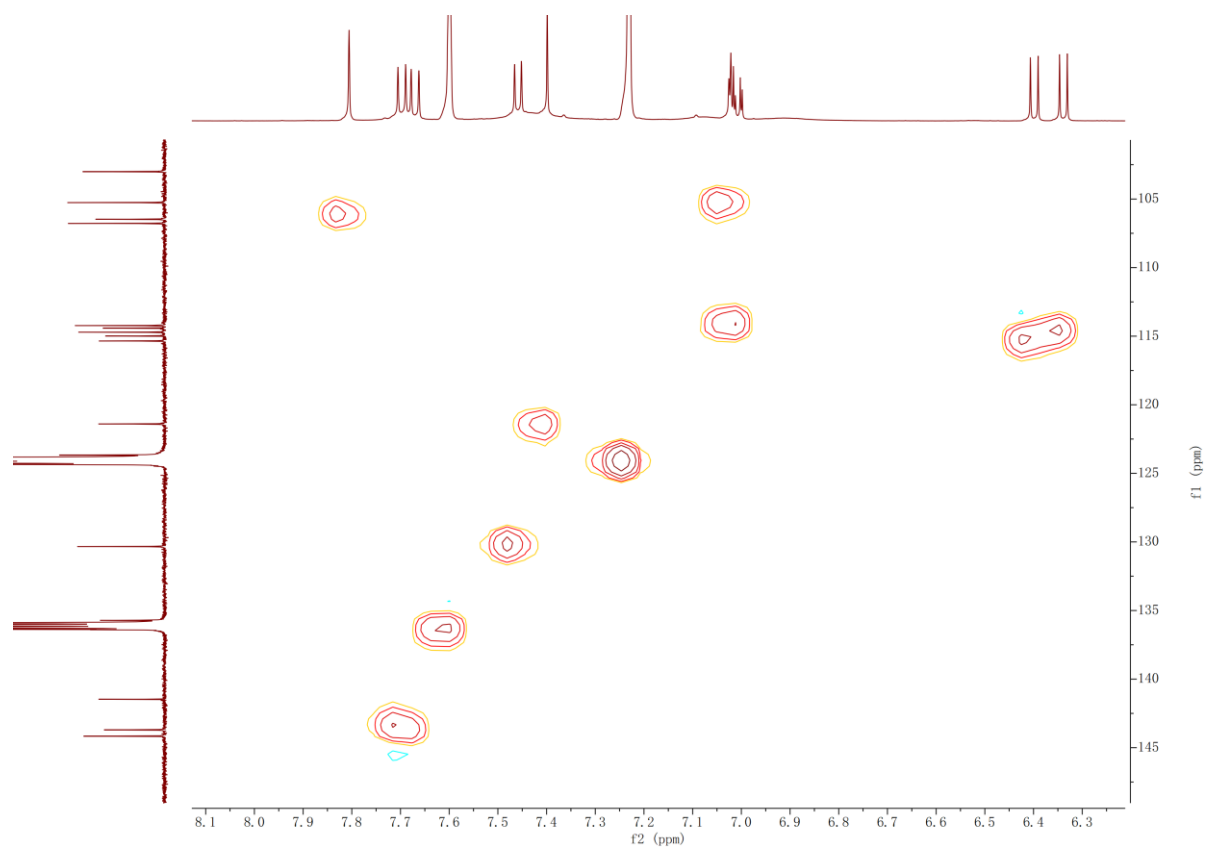

**Figure S15.** HSQC spectrum of compound **1** (600 MHz, pyridine-*d*<sub>5</sub>) (expanded).

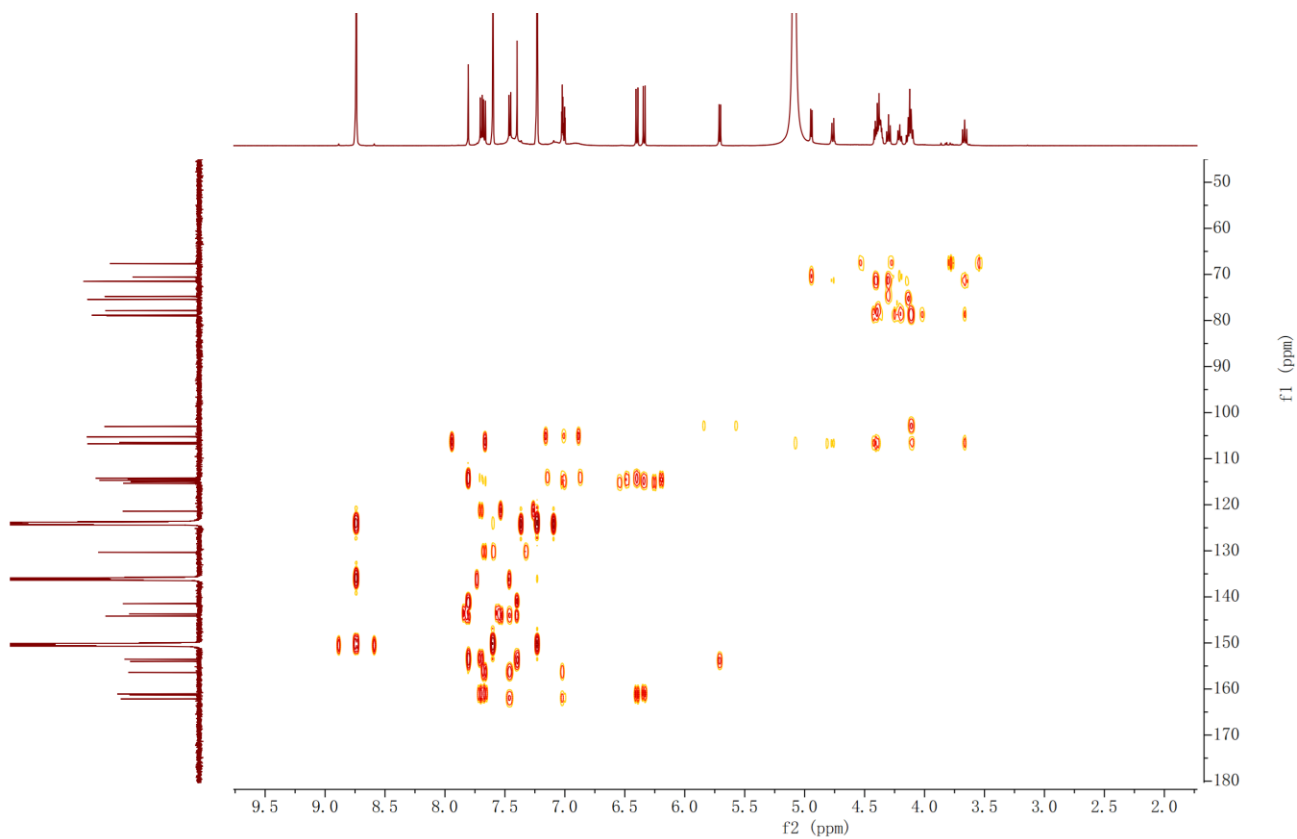

**Figure S16.** HMBC spectrum of compound **1** (600 MHz, pyridine-*d*<sub>5</sub>).

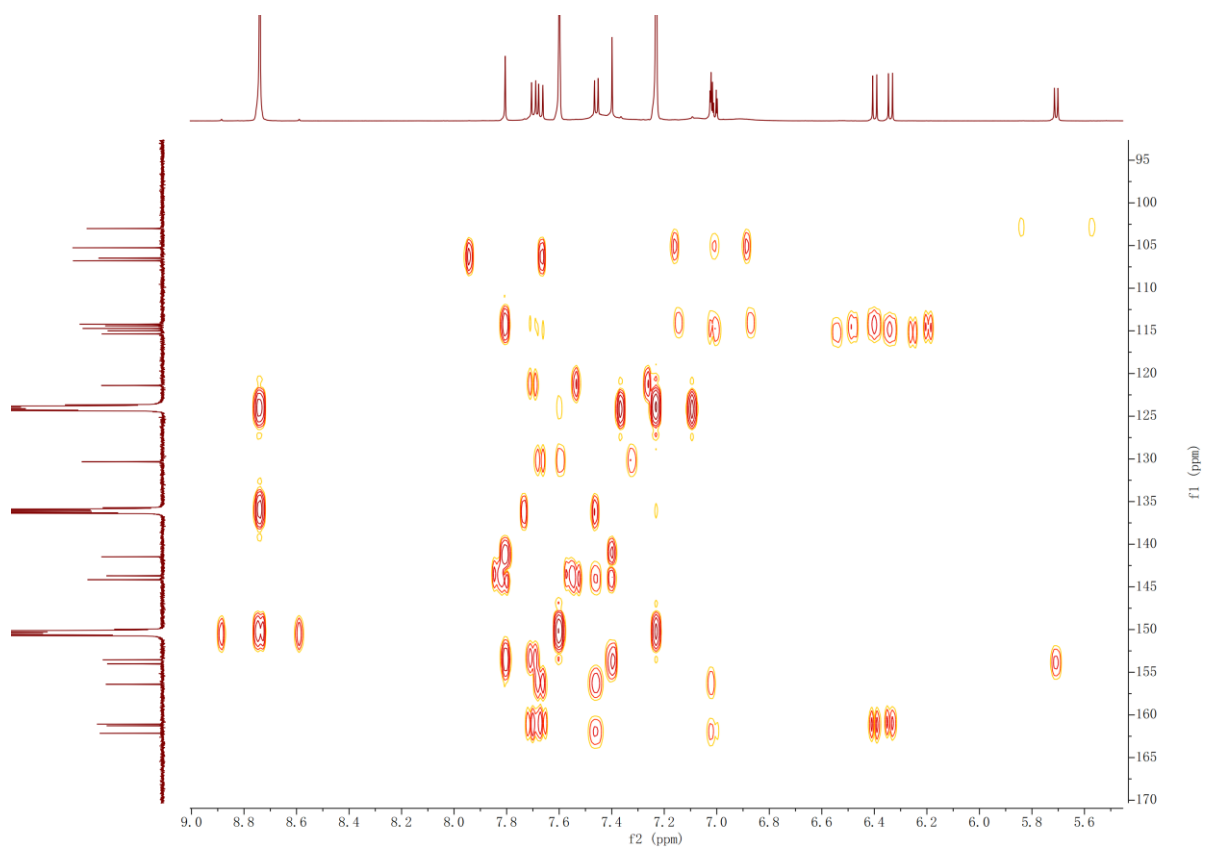

**Figure S17.** HMBC spectrum of compound **1** (600 MHz, pyridine-*d*<sub>5</sub>) (expanded).

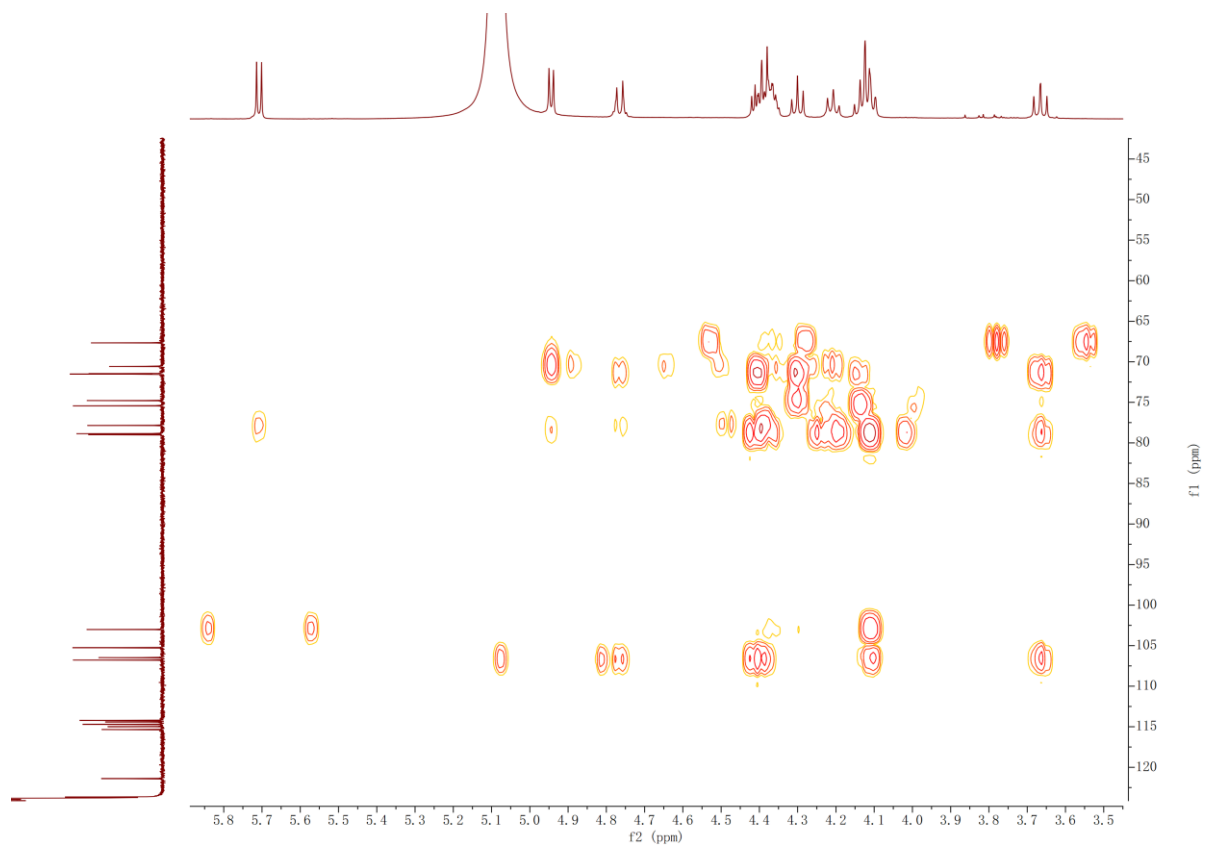

**Figure S18.** HMBC spectrum of compound **1** (600 MHz, pyridine-*d*<sub>5</sub>) (expanded).

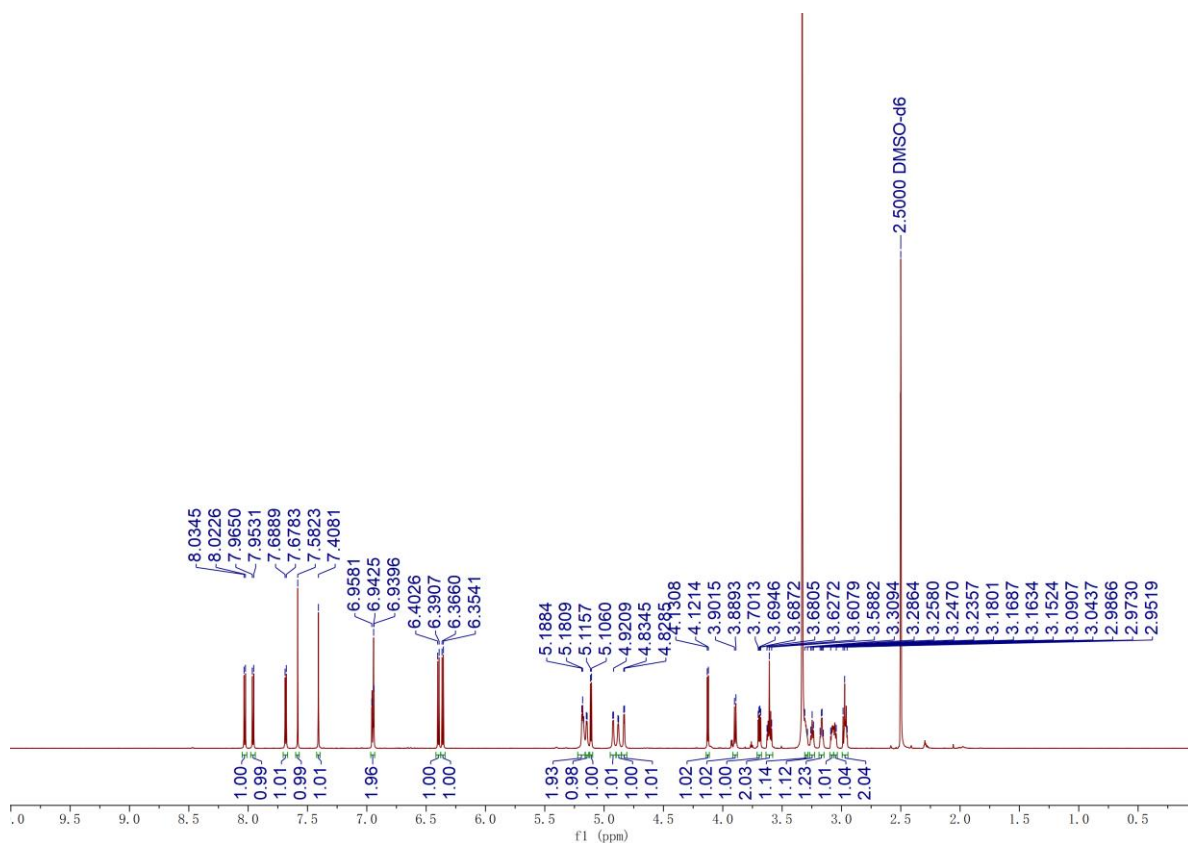

**Figure S19:**  $^1\text{H}$  NMR spectrum of compound **1** (800 MHz,  $\text{DMSO}-d_6$ ).

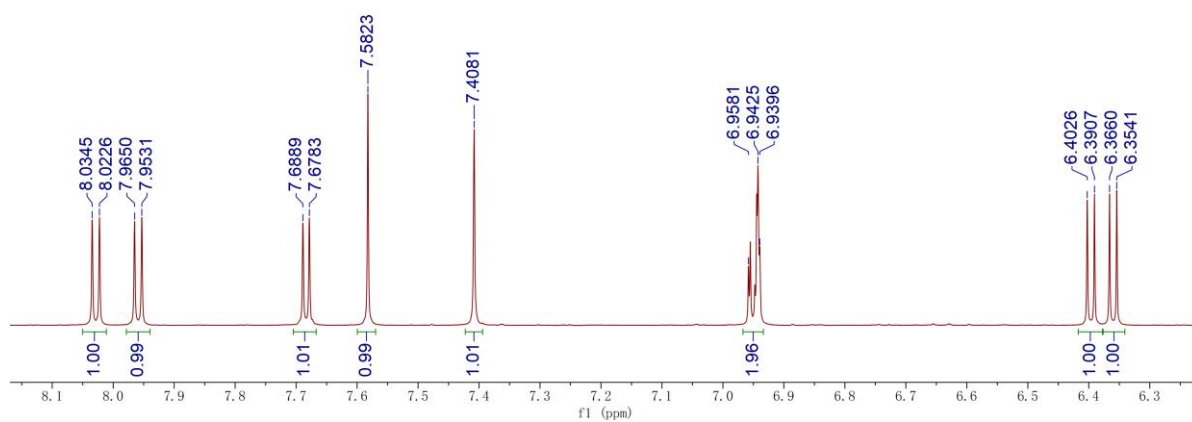

**Figure S20:**  $^1\text{H}$  NMR spectrum of compound **1** (800 MHz,  $\text{DMSO}-d_6$ ) (expanded).

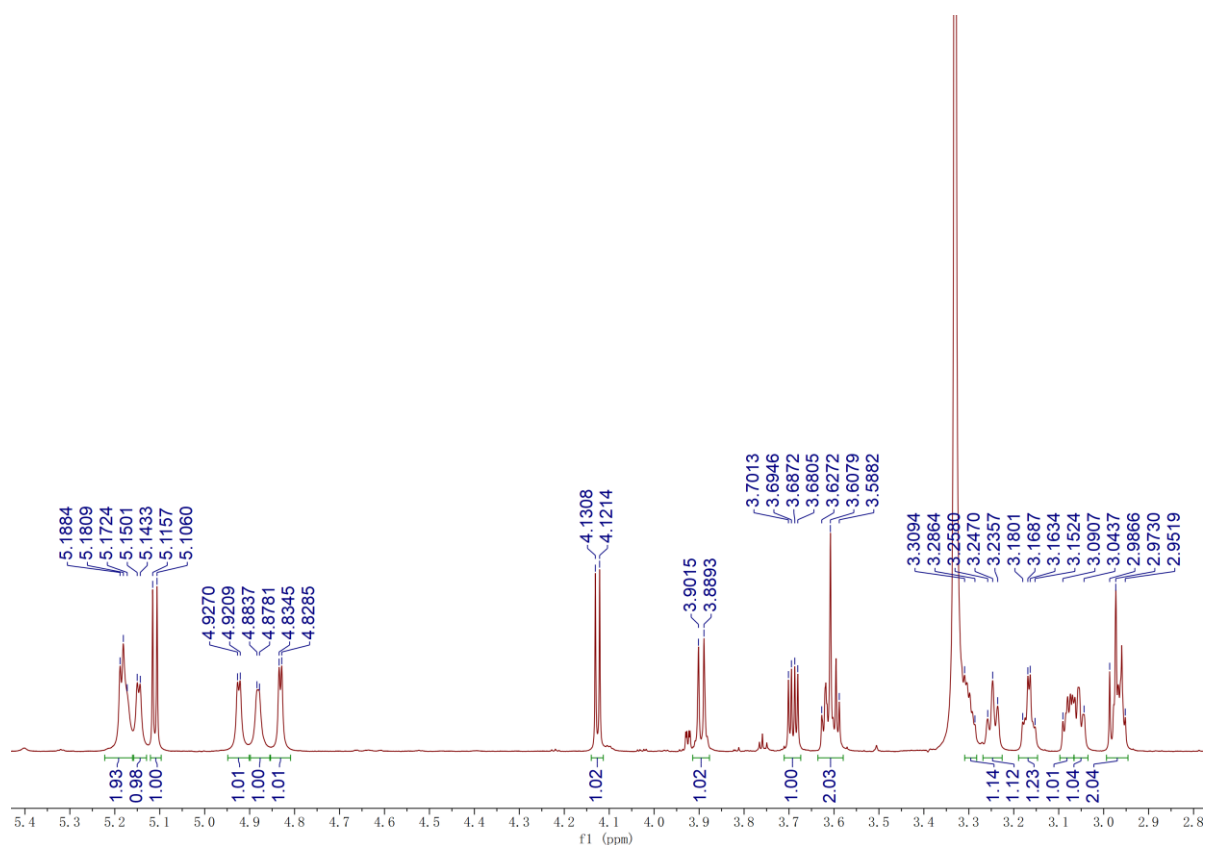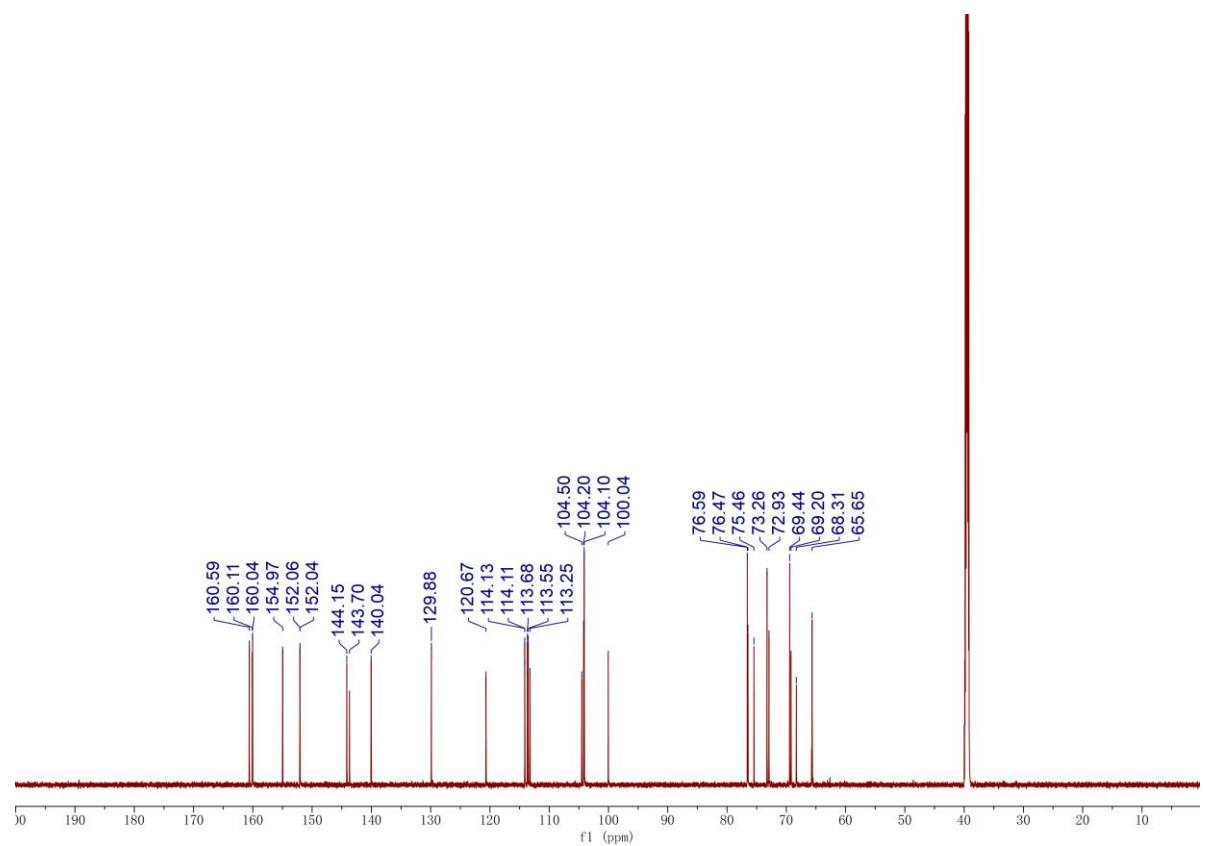

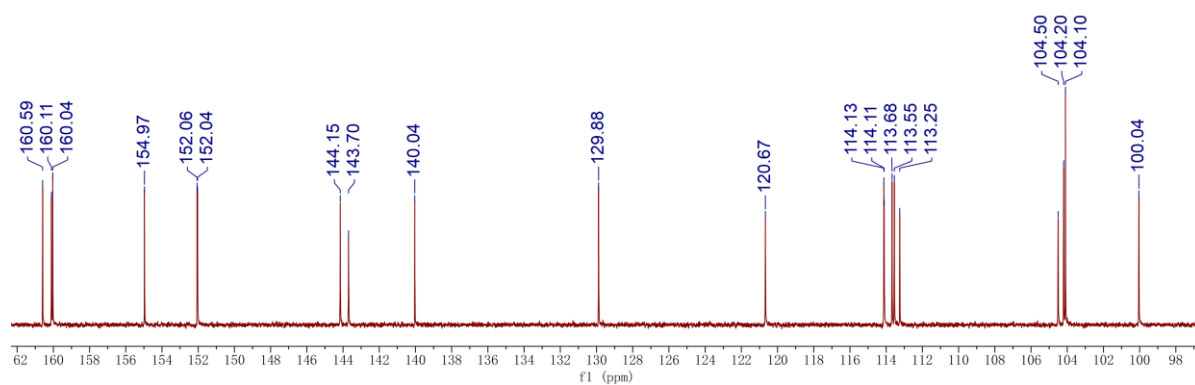

**Figure S23:** <sup>13</sup>C NMR spectrum of compound **1** (200 MHz, DMSO-*d*<sub>6</sub>) (expanded).

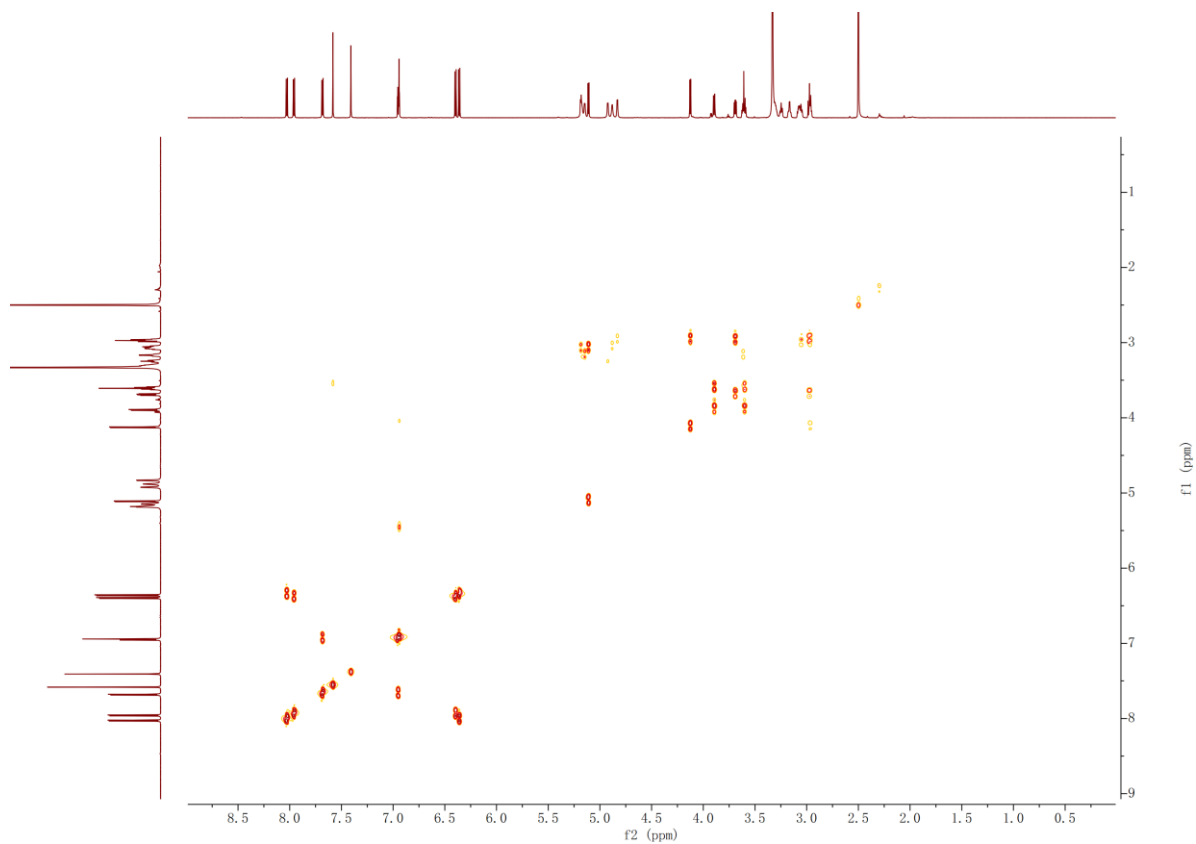

**Figure S24:** <sup>1</sup>H, <sup>1</sup>H COSY spectrum of compound **1** (DMSO-*d*<sub>6</sub>).

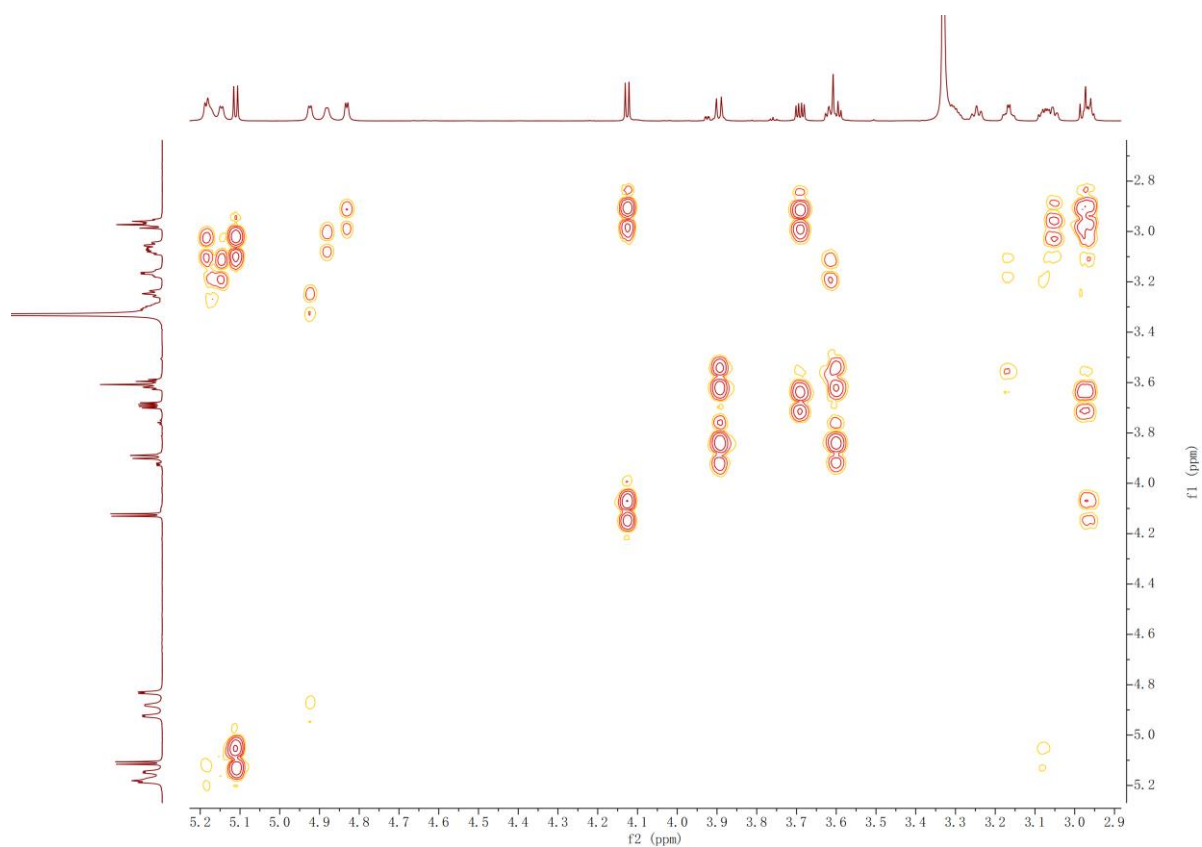

**Figure S25:**  $^1\text{H}$ ,  $^1\text{H}$  COSY spectrum of compound 1 ( $\text{DMSO-}d_6$ ) (expanded).

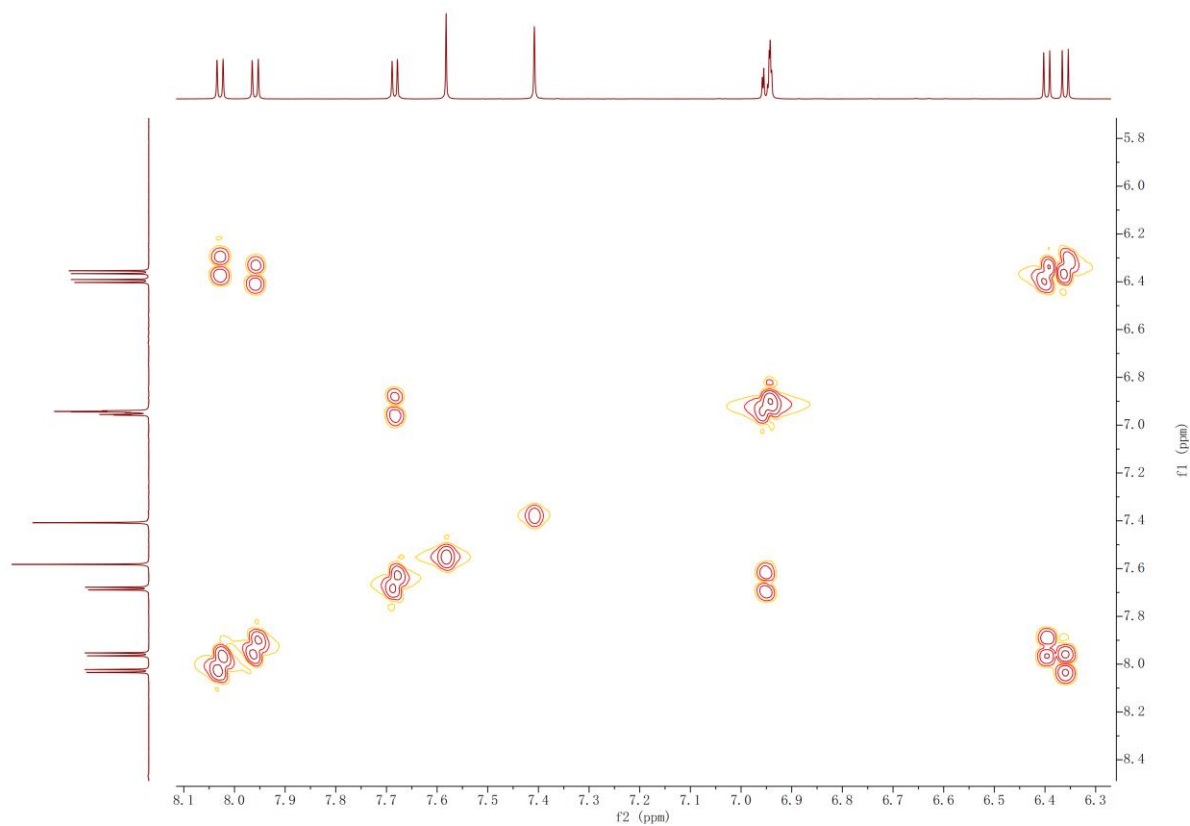

**Figure S26:**  $^1\text{H}$ ,  $^1\text{H}$  COSY spectrum of compound 1 ( $\text{DMSO-}d_6$ ) (expanded).

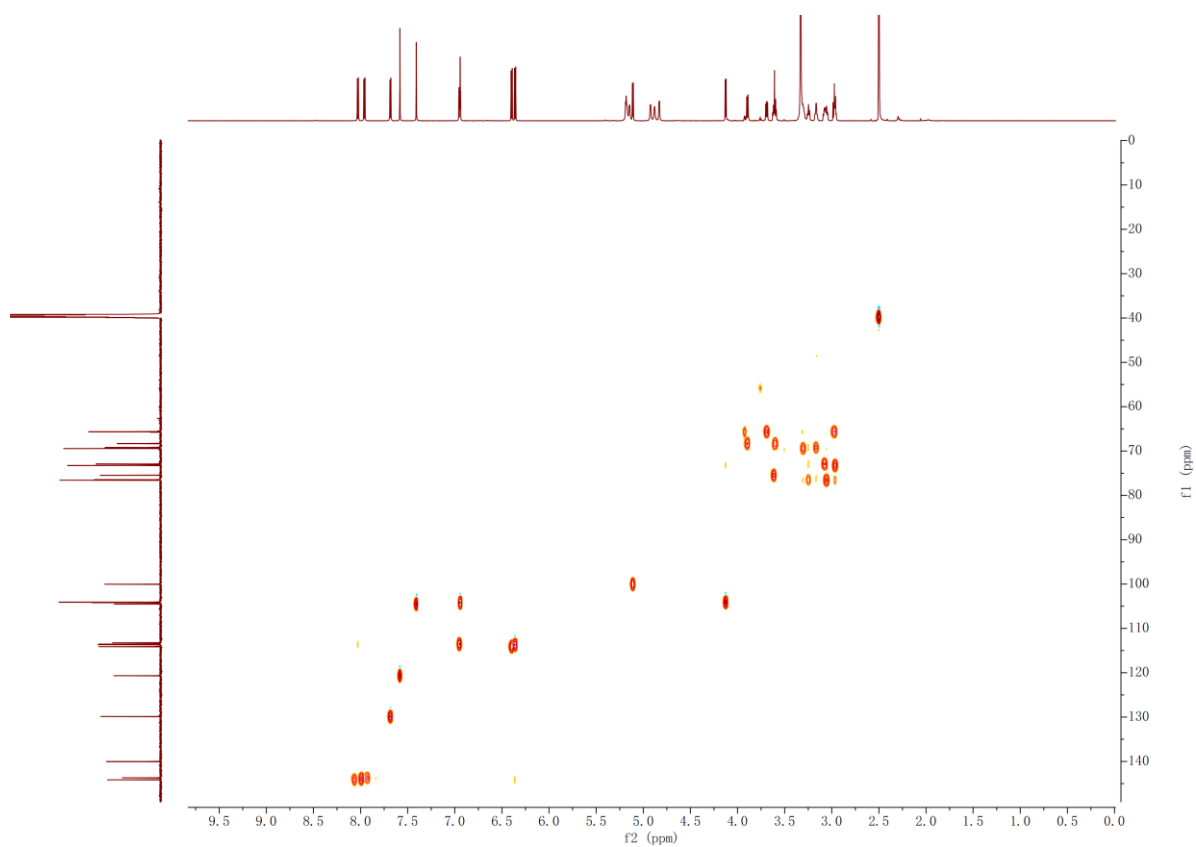

**Figure S27:** HSQC spectrum of compound **1** (DMSO- $d_6$ ).

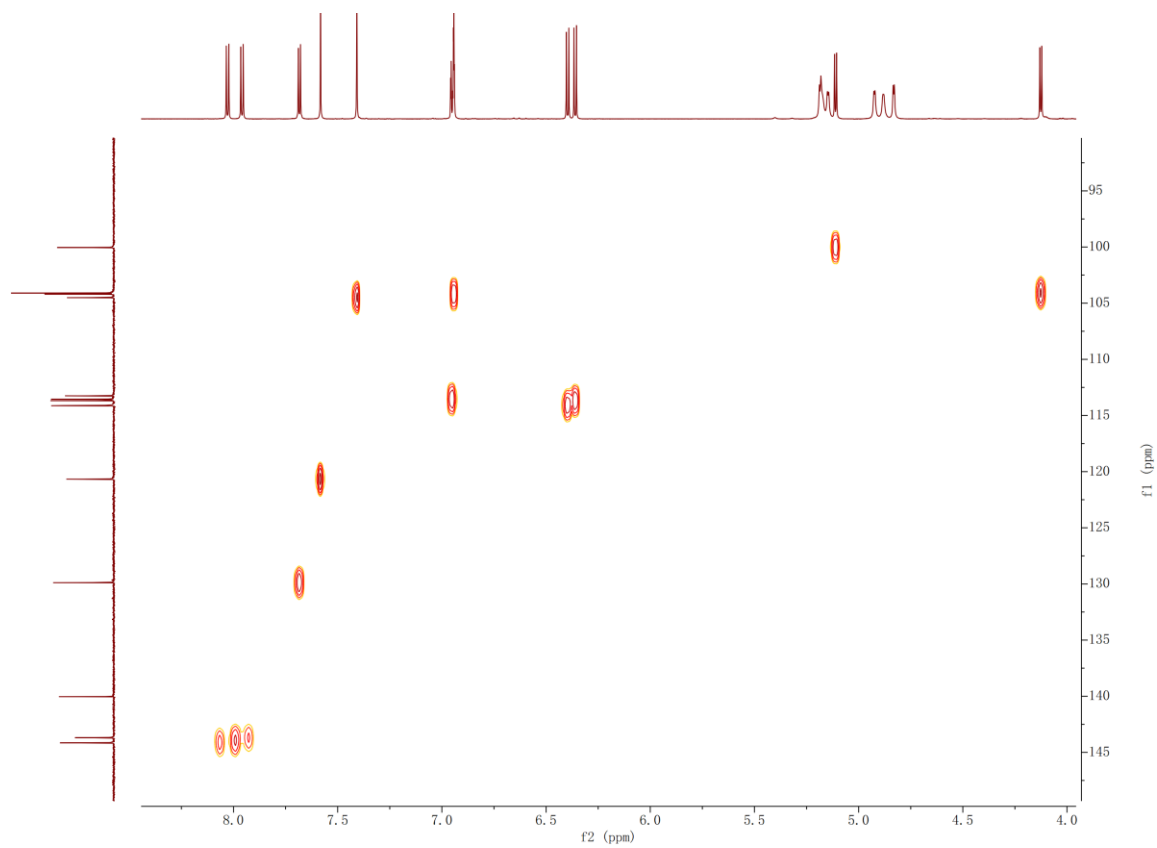

**Figure S28** HSQC spectrum of compound **1** (DMSO- $d_6$ ) (expanded).



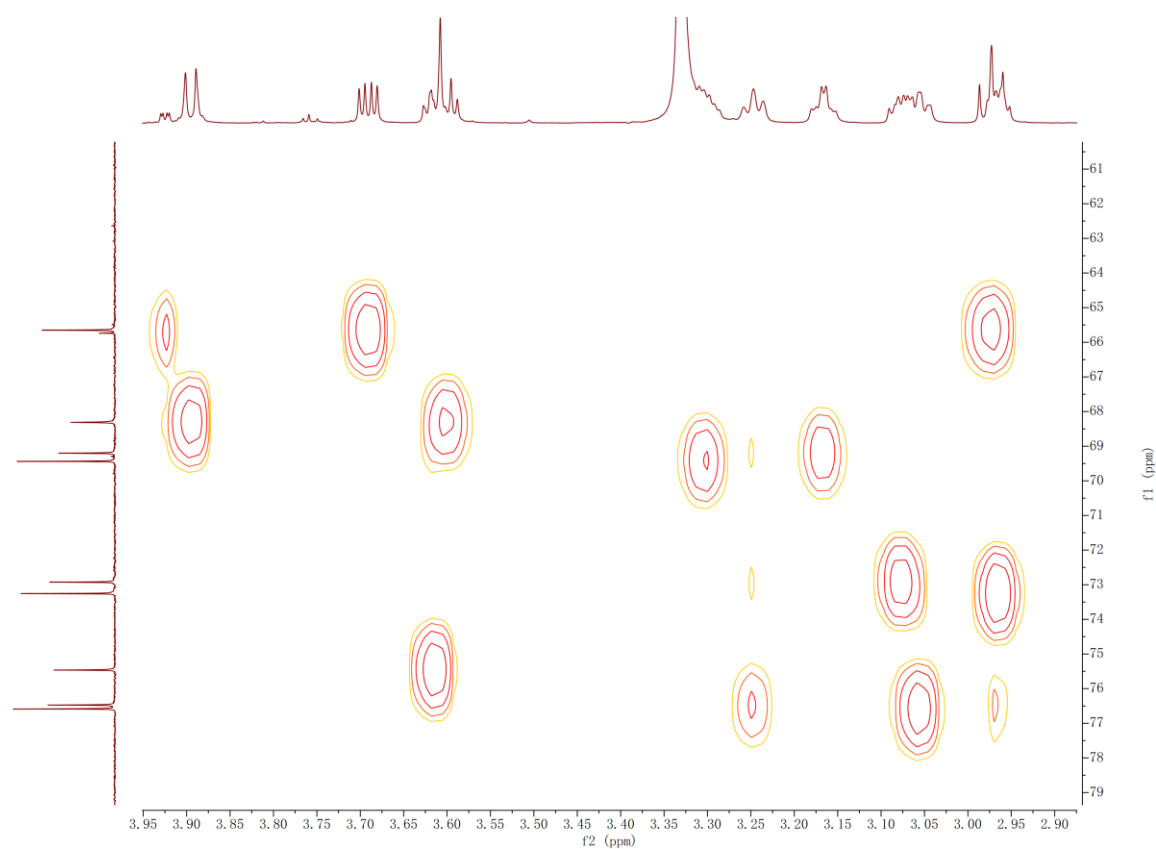

**Figure S29:** HSQC spectrum of compound 1 (DMSO- $d_6$ ) (expanded).

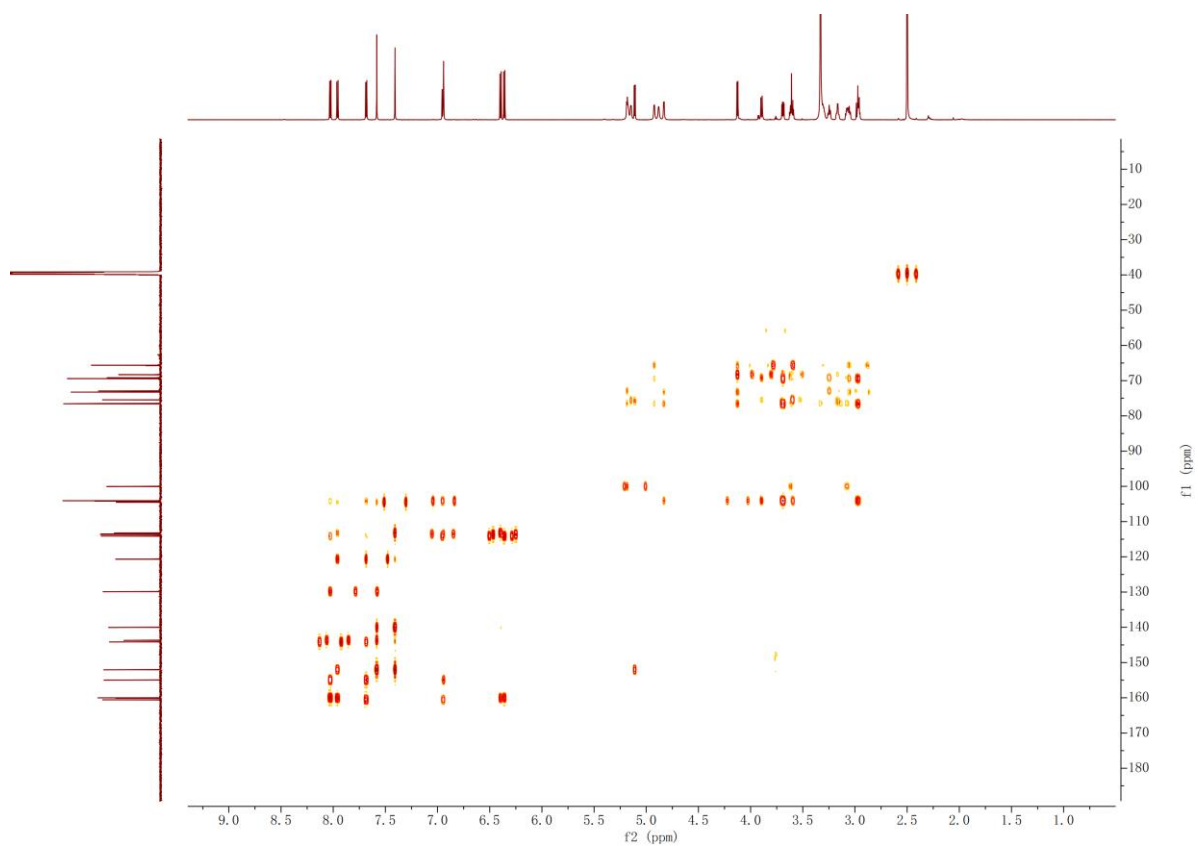

**Figure S30:** HMBC spectrum of compound 1 (DMSO- $d_6$ ).

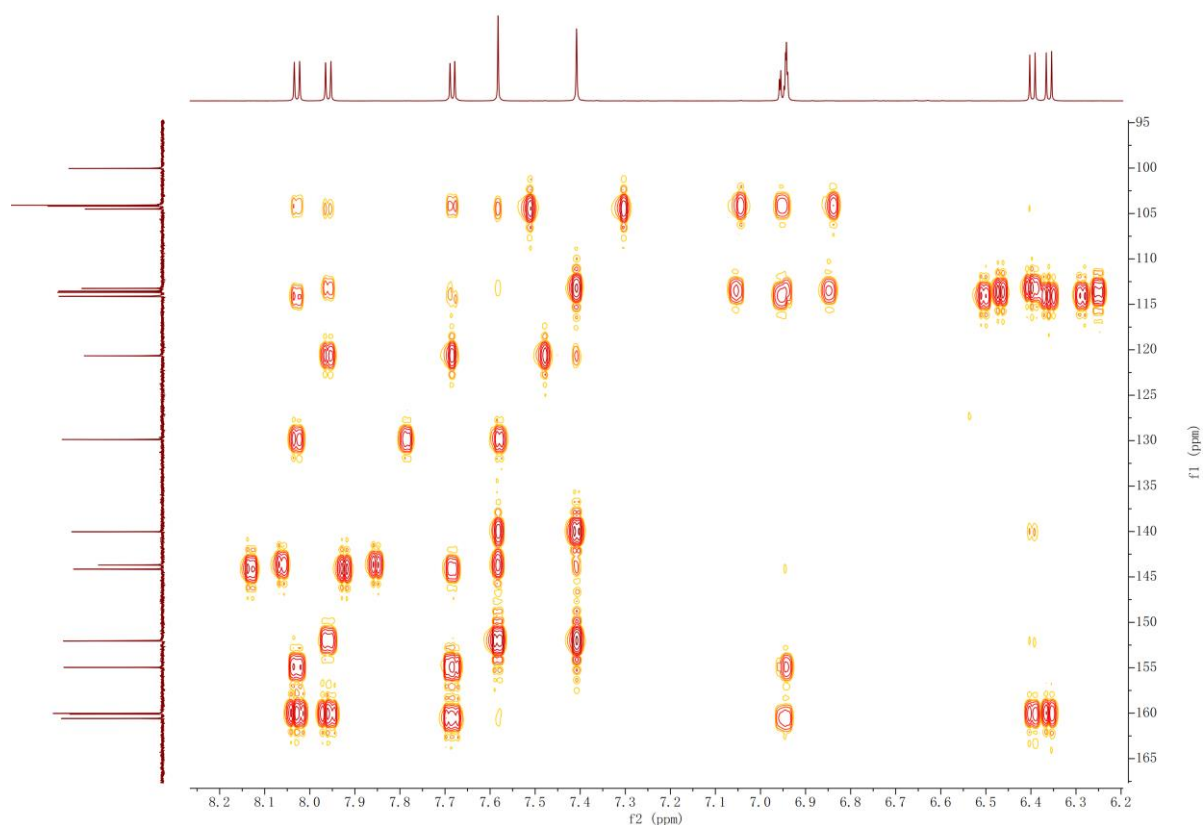

**Figure S31:** HMBC spectrum of compound **1** (DMSO- $d_6$ ) (expanded).

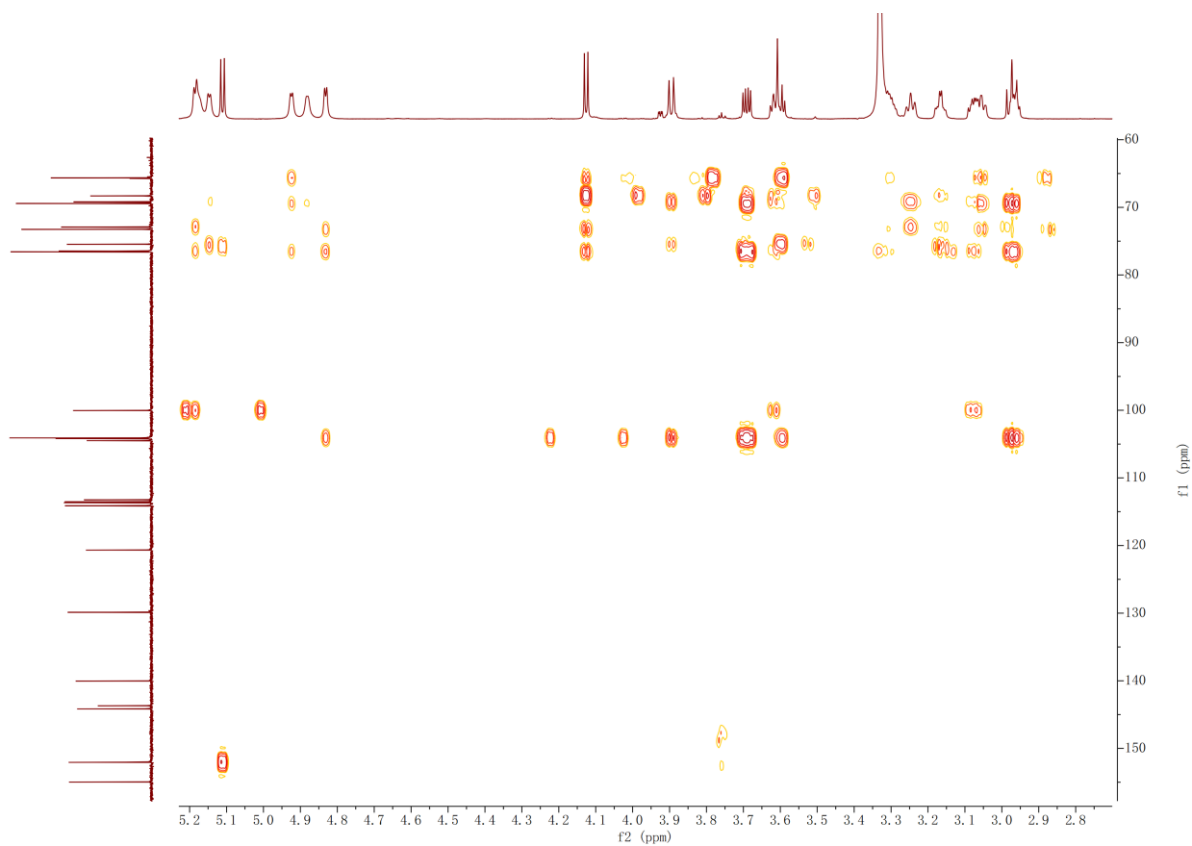

**Figure S32:** HMBC spectrum of compound **1** (DMSO- $d_6$ ) (expanded).

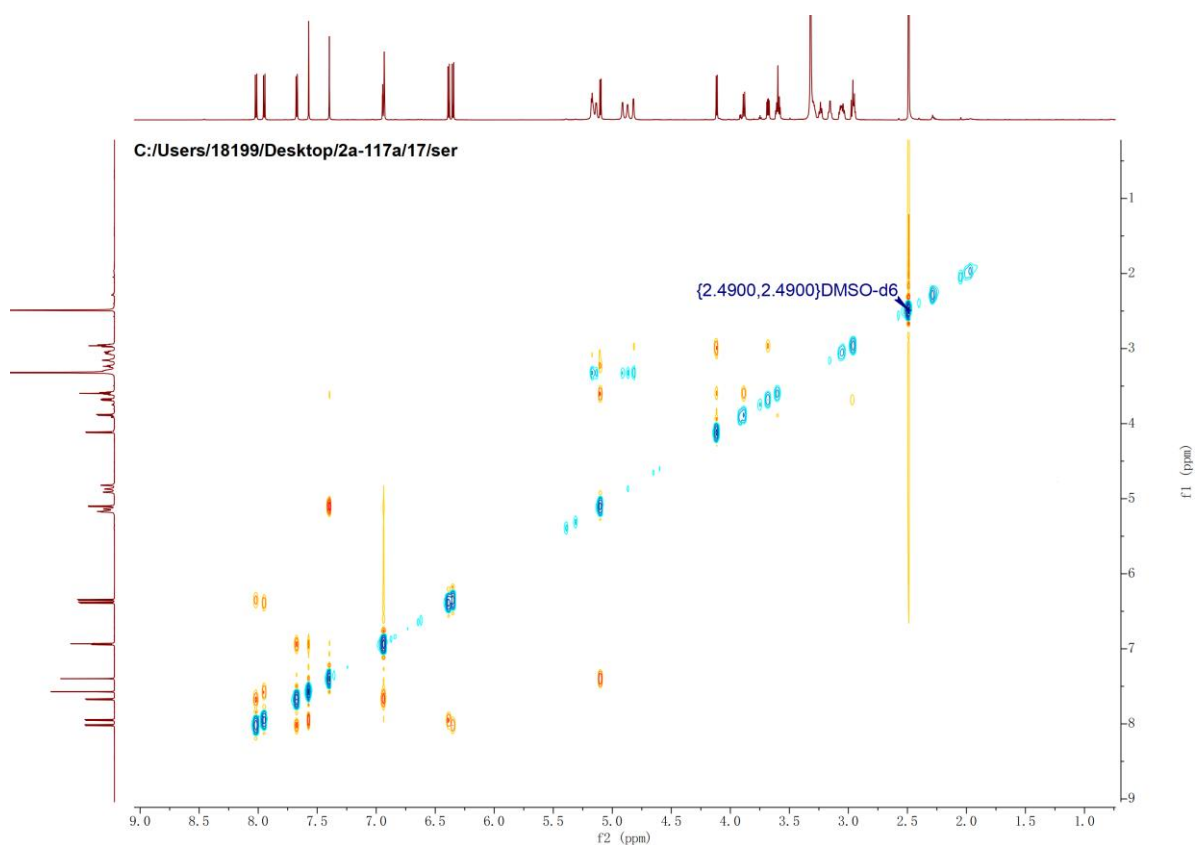

**Figure S33:** ROESY spectrum of compound 1 (DMSO- $d_6$ ).

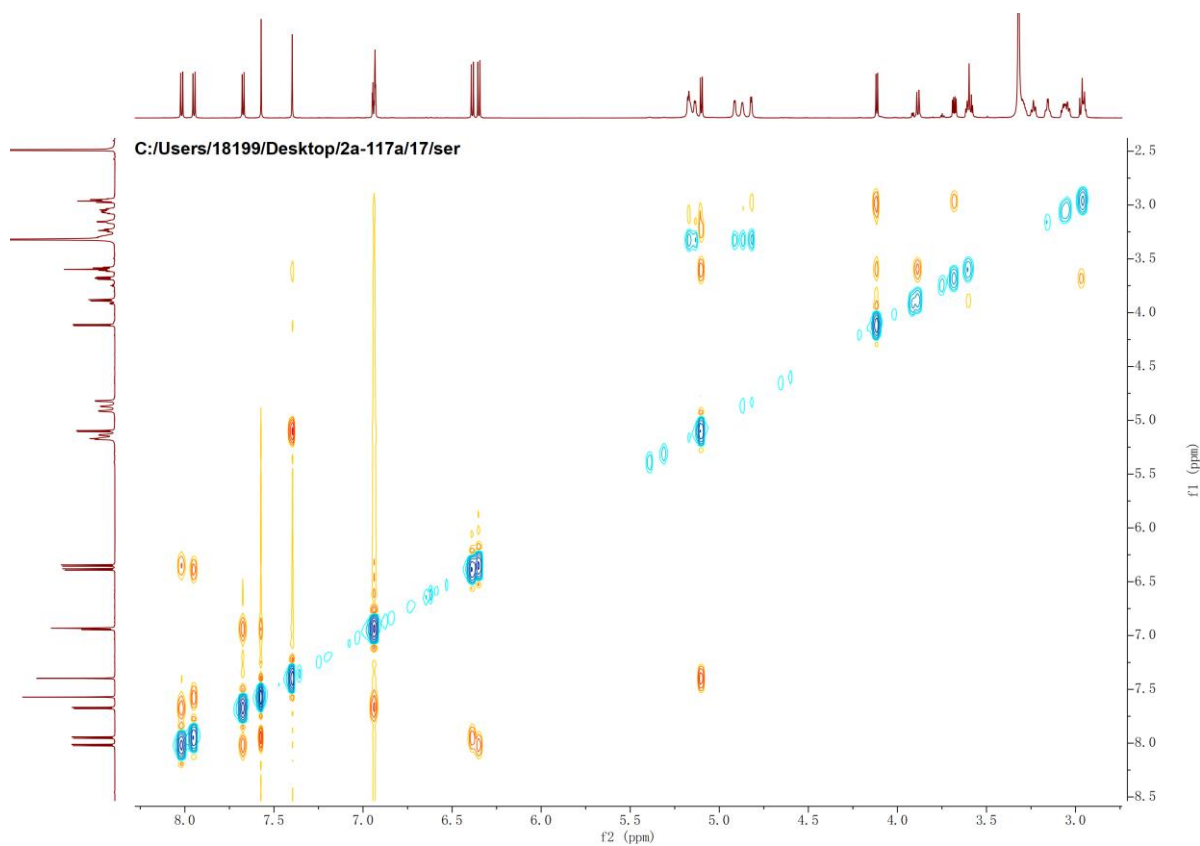

**Figure S34:** ROESY spectrum of compound 1 (DMSO- $d_6$ ) (expanded).
